1 **Gasdermin-D-dependent IL-1 $\alpha$  release from microglia promotes protective immunity**  
2 **during chronic *Toxoplasma gondii* infection**

3

4 Samantha J. Batista<sup>1</sup>, Katherine M. Still<sup>1</sup>, David Johanson<sup>1</sup>, Jeremy A. Thompson<sup>1</sup>, Carleigh A.  
5 O'Brien<sup>1</sup>, John R. Lukens<sup>1</sup>, and Tajie H. Harris<sup>1\*</sup>

6

7 Affiliations: <sup>1</sup>Center for Brain Immunology and Glia, Department of Neuroscience, University of  
8 Virginia, Charlottesville, VA 22908.

9

10 Corresponding Author and Lead Contact:

11 Tajie H. Harris

12 MR-4 Room 6148

13 409 Lane Road

14 Charlottesville, VA 22903

15 Phone: 434-982-6916

16 Fax: 434-982-4380

17 Email: [tajieharris@virginia.edu](mailto:tajieharris@virginia.edu)

18

19 This work was funded by National Institutes of Health grants R01NS091067 and R56NS106028  
20 to T.H.H., R01NS106383 to J.R.L., T32AI007046 to S.J.B., T32GM008328 to K.M.S., and  
21 T32AI007496 to C.A.O., as well as the Carter Immunology Center Collaborative Research Grant  
22 to T.H.H., The Alzheimer's Association grant AARG-18-566113 to J.R.L., The Owens Family  
23 Foundation to J.R.L., and The University of Virginia R&D Award to J.R.L..

24  
25  
26  
27  
28  
29  
30  
31  
32  
33  
34  
35  
36  
37  
38  
39  
40  
41  
42  
43  
44  
45  
46

## Abstract

Microglia, the resident immune cells of the brain parenchyma, are thought to be first-line defenders against CNS infections. We sought to identify specific roles of microglia in the control of the eukaryotic parasite *Toxoplasma gondii*, an opportunistic infection that can cause severe neurological disease. In order to identify the specific function of microglia in the brain during infection, we sorted microglia and infiltrating myeloid cells from infected microglia reporter mice. Using RNA-sequencing, we find strong NF- $\kappa$ B and inflammatory cytokine signatures overrepresented in blood-derived macrophages versus microglia. Interestingly, we also find that IL-1 $\alpha$  is enriched in microglia and IL-1 $\beta$  in macrophages, which was also evident at the protein level. We find that mice lacking IL-1R1 or IL-1 $\alpha$ , but not IL-1 $\beta$ , have impaired parasite control and immune cell infiltration specifically within the brain. Further, by sorting purified populations from infected brains, we show that microglia, not peripheral myeloid cells, release IL-1 $\alpha$  *ex vivo*. Finally, using knockout mice as well as chemical inhibition, we show that *ex vivo* IL-1 $\alpha$  release is gasdermin-D dependent, and that gasdermin-D and caspase-1/11 deficient mice show deficits in immune infiltration into the brain and parasite control. These results demonstrate that microglia and macrophages are differently equipped to propagate inflammation, and that in chronic *T. gondii* infection, microglia specifically can release the alarmin IL-1 $\alpha$ , a cytokine that promotes neuroinflammation and parasite control.

## 47 INTRODUCTION

48 Numerous brain infections cause significant morbidity and mortality worldwide. Many of  
49 these pathogens persist in a chronic latent form in the brain and require constant immune pressure  
50 to prevent symptomatic disease. As the only resident immune cell, microglia are widely assumed  
51 to play an integral role in controlling CNS infections, but in many contexts their specific role  
52 remains poorly understood. One CNS-tropic pathogen is *Toxoplasma gondii*, a eukaryotic parasite  
53 with a broad host range that infects a large portion of the human population.<sup>1-6</sup> *T. gondii* establishes  
54 chronic infections by encysting in immune privileged organs, including the brain.<sup>7,8</sup> Without  
55 sufficient immune pressure, an often fatal neurological manifestation of this disease toxoplasmic  
56 encephalitis can occur.<sup>2,5,6</sup>

57 Studies done in mice, a natural host of this parasite, have elucidated many aspects of the  
58 immune response that are essential for maintaining control of the parasite during chronic stages of  
59 infection. T cell-derived IFN- $\gamma$  is one essential element.<sup>9-11</sup> IFN- $\gamma$  acts on target cells to induce an  
60 anti-parasitic state, allowing for the destruction of the parasite through a number of mechanisms  
61 including the recruitment of immunity-related GTPases (IRGs) and guanylate binding proteins  
62 (GBPs) to the parasitophorous vacuole, as well as the production of nitric oxide (NO).<sup>12-17</sup> Large  
63 numbers of monocytes and monocyte-derived macrophages, a target population for IFN- $\gamma$   
64 signaling,<sup>13</sup> are recruited into the brain parenchyma during chronic *T. gondii* infection in mice, and  
65 these cells are also necessary for maintaining control of the parasite and host survival.<sup>18</sup> Though  
66 microglia occupy the same environment as these cells in the infected brain, have an activated  
67 morphology, their role in chronic *T. gondii* infection has not been fully elucidated. Indeed, whether  
68 microglia and recruited macrophages respond in similar ways to brain infection is an open  
69 question.

70 In this work, we have focused on IL-1, its expression by microglia and macrophages, as  
71 well as its role in the brain during chronic *T. gondii* infection. IL-1 molecules include two main  
72 cytokines: IL-1 $\alpha$  and IL-1 $\beta$ . IL-1 $\alpha$  can function as a canonical alarmin, which is a pre-stored  
73 molecule that does not require processing and can be released upon cell death or damage, making  
74 it an ideal candidate for an early initiator of inflammation.<sup>19,20</sup> In contrast, IL-1 $\beta$  is produced first  
75 as a pro-form that requires cleavage by caspase-1 in order for it to be biologically active, rendering  
76 IL-1 $\beta$  dependent on the inflammasome as a platform for caspase-1 activation.<sup>21-23</sup> Both of these  
77 cytokines signal through the same receptor (IL-1R), a heterodimer of IL-1R1 and IL-1RAcP, with  
78 similar affinity.<sup>24</sup> They also lack signal sequences and thus require a loss of membrane integrity to  
79 be released. Caspase-mediate cleavage of gasdermin molecules has been identified as a major  
80 pathway leading to pore formation and IL-1 release.

81 The role of IL-1 $\beta$  and inflammasome pathways in *T. gondii* infection has been studied *in*  
82 *vitro* as well as in rodent models of acute infection. In sum, these studies suggest roles for IL-1 $\beta$ ,  
83 IL18, IL-1R, NLRP1 and/or NLPR3 inflammasome sensors, the inflammasome adaptor protein  
84 ASC, and inflammatory caspases-1 and -11.<sup>25-28</sup> However, the role of IL-1 signaling in the brain  
85 during chronic infection has not been addressed.

86 Here, we show that though they are present in the same tissue microenvironment in the  
87 brain during *T. gondii* infection, monocyte-derived macrophages in the brain have a stronger NF-  
88  $\kappa$ B signature than brain-resident microglia. Interestingly, we also find that while IL-1 $\alpha$  is enriched  
89 in microglia, IL-1 $\beta$  is overrepresented in macrophages, suggesting that these two cell types are  
90 able to contribute to IL-1-driven inflammation in different ways. We go on to show that IL-1  
91 signaling is, indeed, important in this model as *Il1r1*<sup>-/-</sup> mice chronically infected with *T. gondii* are  
92 less able to control parasite in the brain, and additionally, these mice have deficits in the



93 recruitment of inflammatory monocytes and macrophages into the brain in comparison to wild-  
94 type mice. We find IL-1R1 expression predominantly on blood vasculature in the brain, and  
95 observe IL-1-dependent activation of the vasculature during infection. Further, IL-1-dependent  
96 control of *T. gondii* is mediated through IL-1R1 expression on a radio-resistant cell population.  
97 Interestingly, the pro-inflammatory effect of IL-1 signaling is mediated via the alarmin IL-1 $\alpha$ , not  
98 IL-1 $\beta$ . We show that microglia, but not infiltrating macrophages, release IL-1 $\alpha$  *ex vivo* in an  
99 infection- and gasdermin-D-dependent manner. We propose that one specific function of microglia  
100 during *T. gondii* infection is to release the alarmin IL-1 $\alpha$  to promote protective neuroinflammation  
101 and parasite control.

102

## 103 **RESULTS**

### 104 **Microglia lack a broad inflammatory signature compared to macrophages in the infected** 105 **brain**

106 As the resident macrophages in the brain microglia are assumed to play a significant role in  
107 infections and insults to the brain. *T. gondii* infection results in robust, sustained brain  
108 inflammation that is necessary for parasite control. This inflammation is marked by the infiltration  
109 of blood-derived T cells and monocytes into the brain as well as morphological activation of  
110 microglia. Blood-derived monocytes have been demonstrated to be important for host survival  
111 during infection<sup>18</sup>, but whether microglia perform similar functions is still unknown. Previous  
112 work from our lab has observed that while blood-derived monocytes and macrophages express  
113 high levels of the nitric oxide-generating enzyme iNOS in the brain during *T. gondii* infection,  
114 microglia markedly lack this anti-parasitic molecule.<sup>29</sup> This observation led to the hypothesis that  
115 even though they are in the same tissue microenvironment, microglia are unable to respond to the

116 infection in the same way as infiltrating macrophages. Thus, we used a CX3CR1<sup>Cre-ERT2</sup> x  
117 ZsGreen<sup>fl/stop/fl</sup> mouse line that has been previously described as a microglia reporter line.<sup>30</sup>  
118 Reporter mice were treated with tamoxifen to induce ZsGreen expression and rested for 4 weeks  
119 after tamoxifen injection to ensure turnover of peripheral CX3CR1-expressing cells. We have  
120 consistently used this mouse line in our lab to label over 98% of microglia in the brain. Perivascular  
121 macrophages will also be labeled by this method, but are not purified by our isolation protocol as  
122 evidenced by a lack of CD206<sup>+</sup> cells. Following infection, FACS was used to sort out  
123 CD45<sup>+</sup>CD11b<sup>+</sup> ZsGreen<sup>+</sup> microglia and ZsGreen<sup>-</sup> blood-derived myeloid cells from brains of  
124 infected mice for RNA sequencing analysis (Fig. 1a).

125 Analysis of differentially expressed genes shows that these two cell populations segregate  
126 clearly from each other, confirming that they are fundamentally different cell types (Fig. 1b).  
127 Analysis of pathway enrichment displayed a striking lack of an inflammatory signature in  
128 microglia compared to macrophages (Fig. 1c), and we further show a selection of genes that were  
129 differentially expressed, showing a clear enrichment for inflammation associated genes in the  
130 macrophage population (Fig. 1d). Interestingly, an NF- $\kappa$ B signature seemed to be one factor  
131 differentiating the macrophages from the microglia (Fig. 1c-d). A difference in expression of NF-  
132  $\kappa$ B genes could provide the basis for functional differences between microglia and macrophages  
133 and their ability to respond to the infection. Thus, we aimed to validate this at the protein level in  
134 infected mice. Indeed, in brain sections from infected microglia reporter mice, both RelA and Rel  
135 were distinctly absent from ZsGreen<sup>+</sup> microglia (Fig. 1e-f) but these molecules were present in  
136 ZsGreen<sup>-</sup>Iba1<sup>+</sup> macrophages (Fig. 1g-h). This suggests that some aspects of microglia identity may  
137 inhibit upregulation of a certain inflammatory signature during infection, including a strong NF-  
138  $\kappa$ B response.

139

## 140 **IL-1 genes are differentially expressed by microglia and macrophages**

141 The sequencing data showed that many inflammatory cytokine and chemokine signatures were  
142 also enriched in the macrophages compared to the microglia. Of note, it was observed that the IL-  
143 1 cytokines segregated differently between these populations. IL-1 $\alpha$  was enriched in the microglia  
144 population, while IL-1 $\beta$  was enriched in the macrophage population (Fig. 1d). This suggests that  
145 these two cell types may be differently equipped to propagate innate inflammatory signals. The  
146 lack of microglia expression of pro-IL-1 $\beta$  was validated at the protein level in sections from  
147 infected microglia reporter mice, which also showed its expression by ZsGreen<sup>-</sup>Iba1<sup>+</sup> cells (Fig.  
148 1i-j). On the other hand, staining of tissue sections from chronically infected microglia reporter  
149 mice show IL-1 $\alpha$  expression generally in Iba1<sup>+</sup> cells (Fig. 1k), and further confirm microglial  
150 expression of IL-1 $\alpha$  (Fig. 1l). These results were further confirmed using flow cytometry analysis  
151 on the brains of both WT and microglia reporter mice. IL-1 $\alpha$  protein is present in the brain prior  
152 to infection where it is found in ZsGreen<sup>+</sup> microglia and microglia defined by CD11b<sup>+</sup>CD45<sup>int</sup>  
153 (Fig. S1a-b,d). During chronic infection, it is expressed by both ZsGreen<sup>+</sup> microglia and ZsGreen<sup>-</sup>  
154 myeloid cells (Fig. S1b) also defined by CD11b<sup>+</sup>CD45<sup>int</sup> and CD45<sup>hi</sup> (Fig. S1f). IL-1 $\beta$  was not  
155 detected in uninfected brains, but was detected in the brain during chronic *T. gondii* infection (Fig.  
156 S1b,f). During chronic infection, pro-IL-1 $\beta$  and was not significantly expressed by ZsGreen<sup>+</sup> cells,  
157 but was rather seen in ZsGreen<sup>-</sup> myeloid cells (Fig. S1c) also defined as CD11b<sup>+</sup>CD45<sup>hi</sup> cells (Fig.  
158 S1g). It was also apparent that while ZsGreen<sup>-</sup> blood-derived myeloid cells can express both IL-  
159 1 $\alpha$  and pro-IL-1 $\beta$ , very few ZsGreen<sup>+</sup> microglia were double positive (Fig. S1d). These data  
160 suggested that microglia and macrophages may play different roles in an IL-1 response. Thus, we  
161 aimed to investigate the potential importance of an IL-1 response in *T. gondii* infection.

## 162 ***Il1r1*<sup>-/-</sup> mice have an impaired immune response to *T. gondii* infection**

163 To determine if IL-1 signaling plays a role in chronic *T. gondii* infection, we infected mice lacking  
164 the IL-1 receptor (IL-1R1), which is bound by both IL-1 $\alpha$  and IL-1 $\beta$ . Six weeks post-infection  
165 (p.i.) *Il1r1*<sup>-/-</sup> mice displayed an increase in parasite cyst burden in the brain (Fig. 2a). An increase  
166 in parasite burden is often due to impaired immune responses. Indeed, *Il1r1*<sup>-/-</sup> mice also have a  
167 decrease in the number of CD11b<sup>+</sup>CD45<sup>hi</sup> cells of the monocyte/macrophage lineage in the brain  
168 during chronic infection (Fig. 2b, f-g). Microglia typically express intermediate levels of CD45  
169 compared to the high levels expressed by blood-derived myeloid cells, thus we use this marker as  
170 a proxy to define these populations by flow cytometry.<sup>31</sup> The cells we defined as infiltrating  
171 monocyte/macrophages are also Ly6G<sup>-</sup>, CD11c<sup>-</sup>, and Ly6C<sup>+</sup>. Infiltrating myeloid cells are  
172 important producers of nitric oxide, a key anti-parasitic molecule, and thus we assessed their  
173 expression of inducible nitric oxide synthase (iNOS). *Il1r1*<sup>-/-</sup> mice had significantly decreased  
174 expression of iNOS in the brain compared to WT mice (Fig. 2c, h-i), which was observed  
175 specifically in focal areas of inflammation (Fig. 2j-k). Of note, though there were decreases in  
176 CD4<sup>+</sup> and CD8<sup>+</sup> T cells (Fig. 2d-e), the reduced iNOS expression did not appear to be due to  
177 reductions in IFN- $\gamma$  production from the T cell compartment within the brain, which was  
178 unchanged between groups (Fig. S2a-b). Together, these data suggest that the CNS immune  
179 response is affected in *Il1r1*<sup>-/-</sup> mice, with striking deficits particularly in the myeloid response.

180 Importantly, these differences were restricted to the site of infection, as there were no  
181 deficits in any immune cell compartments in the spleens of *Il1r1*<sup>-/-</sup> mice (Fig. S2c-h). In fact, T  
182 cell and macrophage responses were slightly elevated in the spleen. The immune deficits in *Il1r1*<sup>-/-</sup>  
183 mice are also specific to chronic infection as *Il1r1*<sup>-/-</sup> mice analyzed earlier during  
184 infection (12 dpi) displayed no deficit in their monocyte/macrophage or T cell populations  
185 compared to WT in the peritoneal cavity or the spleen (Fig. S3a-b). IFN- $\gamma$  levels in the serum were,

186 if anything, increased in *Il1r1*<sup>-/-</sup> mice at this time point, indicating that this response is not impaired  
187 (Fig. S3c). The only immune defect detected during this early phase of infection in *Il1r1*<sup>-/-</sup> mice  
188 was a decrease in neutrophils recruited to the peritoneal cavity (Fig. S3a). In sum, these results  
189 show that mice lacking IL-1R1 have an impaired response of blood-derived immune cells in the  
190 brain, leading to increased parasite burden. This suggests that IL-1 signaling promotes immune  
191 responses in the brain during chronic *T. gondii* infection.

192

### 193 **IL-1R1 is expressed by brain vasculature during chronic *T. gondii* infection**

194 Having established a role for IL-1 signaling in promoting the immune response to chronic *T. gondii*  
195 infection in the brain, we next wanted to determine which cells in the brain could respond to IL-1  
196 in the brain environment. We performed immunohistochemical staining for IL-1R1 on brain  
197 sections from chronically infected mice. We found that IL-1R1 was expressed principally on blood  
198 vessels in the brain, as marked by laminin staining which highlights basement membranes of blood  
199 vessels (Fig. 3a-b). Interestingly, expression is not seen continuously along vessels (Fig. 3a-b), nor  
200 on all vessels (Fig. 3b). This suggests a degree of heterogeneity among endothelial cells and  
201 perhaps in their ability to respond to IL-1. We detected IL-1R1 expression specifically on CD31<sup>+</sup>  
202 cells by IHC (Fig. S4a) and by flow cytometry (Fig. S4b-c). To test whether endothelial expression  
203 of IL-1R1 is required in this infection, we first assessed potential contributions from radiosensitive  
204 (hematopoietic) and radio-resistant (non-hematopoietic) cells. To do this, we created bone marrow  
205 chimeras with *Il1r1*<sup>-/-</sup> mice. We lethally irradiated both WT and *Il1r1*<sup>-/-</sup> mice, and then i.v.  
206 transferred bone marrow cells from either WT or *Il1r1*<sup>-/-</sup> mice. We  
207 allowed 6 weeks for reconstitution before infecting the mice with *T. gondii*, and we performed our  
208 analyses at 4 weeks post infection (Fig. 3c). We found that *Il1r1*<sup>-/-</sup> recipients that had received WT

209 bone marrow, had a higher cyst burden in their brain than WT recipients that had received either  
210 WT or *Il1r1*<sup>-/-</sup> bone marrow (Fig. 3d). Consistent with this, *Il1r1*<sup>-/-</sup> recipient mice, regardless of  
211 their source of bone marrow displayed a decrease in total leukocyte numbers in the brain compared  
212 to WT recipients (Fig. 3e). Taken together, these data suggest that IL-1R1 expression on a radio-  
213 resistant cell population is required for host control of the parasite, which is consistent with our  
214 hypothesis that the relevant expression is on brain endothelial cells.

215

### 216 **Vascular adhesion molecule expression in the brain is partially dependent on IL-1R1** 217 **signaling and is necessary for monocyte infiltration**

218 During chronic *T. gondii* infection continual infiltration of immune cells into the brain is necessary  
219 for maintaining control of the parasite. One step in getting cells to successfully infiltrate the brain,  
220 as in other tissues, is the interaction with activated endothelium expressing vascular adhesion  
221 molecules as well as chemokines. Indeed, the brain endothelium is activated during chronic *T.*  
222 *gondii* infection compared to the naïve state, as seen by increased expression of ICAM-1 and  
223 VCAM-1 molecules on brain endothelial cells (Fig. S5a-d). Our data show that ICAM-1 is  
224 expressed to a higher extent by endothelial cells that express IL-1R1 compared to cells that do not  
225 in the naïve state (Fig. S5e), and that IL-1R1<sup>+</sup> endothelial cells also express VCAM-1 in infected  
226 tissues (Fig. S5f).

227 We investigated the dependence of these molecules on IL-1 signaling in our model, and  
228 found that their expression is dependent in part on IL-1 signaling. *Il1r1*<sup>-/-</sup> mice displayed decreased  
229 mRNA expression of *Icam1*, *Vcam1*, and *Ccl2* in the brain (Fig. 3f) as assessed using whole brain  
230 homogenate from chronically infected mice. To more specifically address effects on the CNS  
231 vasculature, we examined expression of ICAM-1 and VCAM-1 protein in brain sections of WT

232 and *Il1r1*<sup>-/-</sup> mice during chronic infection using IHC (Fig. 3g-j). Representative images show a  
233 marked decrease in ICAM-1 and VCAM-1 reactivity on blood vessels in the brains of *Il1r1*<sup>-/-</sup> mice  
234 compared to WT (Fig. 3g-j). Together, these data show that the increased expression of vascular  
235 adhesion molecules, and potentially chemokine, in the brain that is characteristic of chronic *T.*  
236 *gondii* infection is partially dependent on IL-1 signaling. The modulation of adhesion molecule  
237 expression may be one mechanism by which IL-1 promotes the infiltration of immune into the  
238 brain during chronic *T. gondii* infection.

239 To determine the importance of ICAM-1 and VCAM-1 in the recruitment of infiltrating  
240 monocytes during chronic *T. gondii* infection, we used antibody treatments to block their ligands  
241 (LFA-1 and VLA-4 respectively) *in vivo*. We treated chronically infected WT mice with a  
242 combination of  $\alpha$ -LFA-1 and  $\alpha$ -VLA-4 blocking antibodies, giving a total of two treatments. After  
243 5 days of treatment, mice receiving blocking antibody displayed decreases in the number of  
244 infiltrating myeloid cells isolated from the brain compared to control treated mice (Fig. S5g).  
245 Specifically, we observed deficits in the Ly6C<sup>hi</sup> population (Fig. S5h), indicating a lack of blood-  
246 derived monocytes. The decrease in monocyte entry translated into fewer iNOS<sup>+</sup> cells in the brain  
247 as well (Fig. S5i). These data show that interactions with ICAM-1 and VCAM-1 are necessary for  
248 monocyte infiltration into the brain during chronic infection, and that IL-1 signaling promotes the  
249 expression of these adhesion molecules.

250

### 251 **IL-1 $\alpha$ <sup>-/-</sup> but not IL-1 $\beta$ <sup>-/-</sup> mice have an impaired immune response to *T. gondii* infection**

252 IL-1 $\alpha$  and IL-1 $\beta$  both bind to and signal through IL-1R1. Having established a role for IL-1  
253 signaling in promoting the myeloid response in the brain during chronic *T. gondii* infection, we  
254 next sought to determine whether this effect was mediated by one or both of these cytokines, given

255 that IL-1 $\alpha$  and IL-1 $\beta$  are expressed by different populations of myeloid cells in the infected brain.  
256 To address this, we infected mice lacking either IL-1 $\alpha$  or IL-1 $\beta$  and analyzed the cellular immune  
257 response and parasite burden during chronic phase of infection. At six weeks post-infection, IL-  
258 1 $\alpha^{-/-}$  mice displayed an increase in parasite burden compared to WT as measured by qPCR analysis  
259 of parasite DNA from brain homogenate (Fig. 4a). IL-1 $\beta^{-/-}$  mice, however, showed no change in  
260 parasite burden compared to WT (Fig. 4a). This suggests that, rather unexpectedly, IL-1 $\alpha$  is  
261 involved in maintaining control of the parasite during chronic infection, while IL-1 $\beta$  is not.

262 IL-1 $\alpha^{-/-}$  mice displayed fewer focal areas of inflammation compared to WT (Fig. 4b-c), as  
263 seen by clusters of immune cells in H&E stained brain sections. We further found that IL-1 $\alpha^{-/-}$   
264 mice, like *Il1r1* $^{-/-}$  mice, have decreases in peripheral monocyte/macrophage populations infiltrating  
265 the brain as well as a decrease in the number of iNOS-expressing cells compared to WT (Fig. 4d-  
266 e). They also had a decrease in CD8 $^{+}$  T cells in the brain (Fig. 4f-g). On the other hand, IL-1 $\beta^{-/-}$   
267 mice displayed no difference from WT in the number of peripheral myeloid cells infiltrating the  
268 brain during chronic infection, or in the number of these cells that are expressing iNOS across  
269 multiple experiments (Fig. 4h-i), which is consistent with no change in parasite burden in these  
270 mice. IL-1 $\beta^{-/-}$  mice also showed no defect in T cell infiltration (Fig. 4j-k). Together, these results  
271 suggest that the role of IL-1 signaling in promoting immune responses in the brain during chronic  
272 *T. gondii* infection is mediated by IL-1 $\alpha$ , rather than by IL-1 $\beta$ .

273

#### 274 **IL-1 $\alpha$ is released *ex vivo* from microglia isolated from *T. gondii* infected brains**

275 Our results demonstrate a role for IL-1 $\alpha$  in chronic *T. gondii* infection. We have also shown that  
276 microglia in the infected brain are enriched in IL-1 $\alpha$  compared to macrophages, though it is  
277 expressed by both populations. Thus, we aimed to determine which cell type releases IL-1 $\alpha$  in this



278 model. Uninfected mice treated with PLX5622 for 12 days to deplete microglia lost almost all IL-  
279  $1\alpha$  mRNA expression in the brain (Fig. 5a), consistent with flow cytometry and  
280 immunohistochemistry data detecting IL- $1\alpha$  in microglia in naïve mice (Fig. S1a-b,d). To further  
281 examine IL- $1\alpha$  release during infection, we first established an assay to measure IL- $1\alpha$  release  
282 from isolated brain cells *ex vivo*. A single cell suspension was generated from brain homogenate,  
283 brain mononuclear cells were washed and plated in complete media for 18 hours, and supernatant  
284 was collected for analysis by ELISA. Using this method, we found that cells isolated from mouse  
285 brain can indeed release IL- $1\alpha$  in an infection-dependent manner (Fig. 5b). It should be noted that  
286 isolated spleen cells from infected animals did not release detectable IL- $1\alpha$ . We then used our  
287 microglia reporter model to FACS sort ZsGreen<sup>+</sup> microglia and ZsGreen<sup>-</sup> myeloid cells from  
288 infected mice. Equal numbers of microglia and peripheral myeloid cells were plated and  
289 supernatant was collected to measure IL- $1\alpha$  release. We observed a very clear difference in these  
290 populations; purified microglia released IL- $1\alpha$  *ex vivo*, while purified monocytes/macrophages  
291 released negligible amounts of this cytokine (Fig. 5c). We show that this difference in IL- $1\alpha$   
292 release does not appear to do due to overall increased death in microglia *ex vivo* as blood-derived  
293 cells actually released more LDH (Fig. 5d). We also show that IL- $1\alpha$  release is inhibited when  
294 membrane integrity is preserved with glycine treatment (Fig. 5e) as well the total possible IL- $1\alpha$   
295 release from isolated brain mononuclear cells *ex vivo* (Fig. 5f). Taken together, these findings show  
296 that microglia from infected mice have the capability to release IL- $1\alpha$ , which could suggest that  
297 microglia and macrophages may undergo different types cell death.

298

299 **Caspase-1/11<sup>-/-</sup> mice have an impaired response to *T. gondii* infection**

300 To begin to address whether inflammatory cell death could release IL-1 $\alpha$  in the brain during  
301 chronic *T. gondii* infection, we first took a broad look at cell death in the brain. 4 weeks p.i., mice  
302 were injected intraperitoneally (i.p.) with propidium iodide (PI). 24 hours after PI injection, mice  
303 were sacrificed for analysis. PI uptake in cells, which is indicative of cell death or severe membrane  
304 damage, was observed in the brains of *T. gondii* infected mice, and appeared in focal areas (Fig.  
305 6a-b), suggesting that there is cell death occurring in the brain during chronic infection.

306 Inflammasome activation has been implicated *in vitro* and during acute *T. gondii* infection,  
307 and could potentially be involved in IL-1 $\alpha$  release. IL-1 $\alpha$ , like IL-1 $\beta$ , is not canonically secreted  
308 and requires cell death or significant membrane perturbation to be released extracellularly.<sup>20,32-34</sup>  
309 Unlike IL-1 $\beta$ , IL-1 $\alpha$  does not need to be processed by the inflammasome platform for its activity,  
310 however, because permeabilization of the plasma membrane is required for IL-1 $\alpha$  to be released,  
311 inflammasome-mediated cell death may still contribute to its release. To look for evidence of  
312 inflammasome activation the brains of mice chronically infected with *T. gondii*, we infected ASC-  
313 citrine reporter mice, in which the inflammasome adaptor protein apoptosis-associated speck-like  
314 protein containing CARD (ASC) is fused with the fluorescent protein citrine. Upon inflammasome  
315 activation, the reporter shows speck-like aggregates of tagged ASC. In the brain during chronic *T.*  
316 *gondii* infection, ASC specks were observed around areas of inflammation in Iba1<sup>+</sup> microglia or  
317 macrophages (Fig. 6c). We further crossed the ASC-citrine mouse line to the microglia reporter  
318 mouse line. Following infection, ASC specks were observed contained within microglia in the  
319 infected brain (Fig. 6d).

320 To further investigate a role for inflammasome-dependent processes in chronic *T. gondii*  
321 infection, we infected caspase-1/11<sup>-/-</sup> mice. Six weeks p.i., mice lacking these inflammatory  
322 caspases had an increased number of parasite cysts in their brains (Fig. 6e), indicating impaired

323 parasite control. Caspase-1/11<sup>-/-</sup> mice also have a decrease in the number of cells of the  
324 monocyte/macrophage lineage in the brain during chronic infection (Fig. 6f), as well as  
325 significantly fewer infiltrating myeloid cells expressing iNOS in the brain compared to WT mice  
326 (Fig. 6g). These mice also displayed decreases in CD4<sup>+</sup> T cells (Fig. 6h-i). In addition to an  
327 increased overall cyst burden, caspase-1/11<sup>-/-</sup> mice had more instances of clusters of parasite cysts  
328 compared to WT (Fig. 6j-k), likely indicating a lack of parasite control in areas of parasite  
329 reactivation. Together, these results are similar to those observed in infected *Il1r1*<sup>-/-</sup> mice and show  
330 that caspase-1/11 activity is important for host control of *T. gondii* infection.

331

### 332 **Gasdermin-D<sup>-/-</sup> mice have an impaired response to *T. gondii* infection and impaired IL-1 $\alpha$** 333 **release**

334 Our data implicate an inflammasome-dependent processes in the control of *T. gondii* in the brain,  
335 thus we investigated the importance of gasdermin-D, the pore-forming executor of pyroptosis.<sup>23,35-</sup>  
336 <sup>37</sup> We utilized gasdermin-D (*gsdmd*)<sup>-/-</sup> mice to specifically assess the importance of pyroptosis.  
337 Six weeks p.i., *gsdmd*<sup>-/-</sup> mice displayed a significant increase in parasite cyst burden compared to  
338 WT (Fig. 7a). Like *Il1r1*<sup>-/-</sup>, IL-1 $\alpha$ <sup>-/-</sup>, and caspase-1/11<sup>-/-</sup> mice, *gsdmd*<sup>-/-</sup> mice also displayed a  
339 decrease in the number of immune cells infiltrating the brain (Fig. 7b).

340 To directly assess the contribution of pyroptosis to IL-1 $\alpha$  release, brain mononuclear cells  
341 were isolated from *gsdmd*<sup>-/-</sup> mice and *ex vivo* IL-1 $\alpha$  release was determined by ELISA. Cells  
342 isolated from the brains of *gsdmd*<sup>-/-</sup> mice released significantly less IL-1 $\alpha$  into the supernatant than  
343 cells from WT mice, about a 70 percent reduction in IL-1 $\alpha$  release (Fig. 7c). We also utilized  
344 necrosulfonamide (NSA), which has been shown to be a specific inhibitor of *gsdmd* in mice.<sup>38</sup>  
345 Brain cells isolated from WT mice were analyzed for *ex vivo* IL-1 $\alpha$  release under control

346 conditions, or incubated with 20 $\mu$ M NSA (Fig. 7d). Strikingly, NSA inhibited *ex vivo* IL-1 $\alpha$   
347 release, indicating that release is dependent on *gsdmd*. Taken together, these results suggest that  
348 IL-1 $\alpha$  is released from cells from infected brains in a *gsdmd*<sup>-/-</sup>-dependent manner, and promotes  
349 the infiltration of anti-parasitic immune cells into the *T. gondii* infected brain.

350

## 351 **DISCUSSION**

352 *Toxoplasma gondii* establishes a chronic brain infection in its host, necessitating long-term  
353 neuroinflammation.<sup>5,6,39</sup> Much is known about the immune response to this parasite, but the role  
354 of the brain-resident microglia is still largely unknown. Early studies using culture systems of  
355 murine and human microglia showed that IFN- $\gamma$  and LPS treatment prior to infection inhibited  
356 parasite replication.<sup>40-42</sup> However, understanding of microglia-specific functions in brain  
357 infections has been hindered by the fact that microglia rapidly lose their identity in culture.<sup>43</sup>  
358 Moreover, culture techniques do not recapitulate the complex interactions microglia have during  
359 infection with other cells or the tissue architecture of the brain. Thus, we aimed to examine  
360 microglia and macrophages within the brain to begin to uncover their function.

361 Through RNA-seq analysis as well as staining of infected brain tissue, we find that there  
362 is an NF- $\kappa$ B signature present in brain-infiltrating monocytes/macrophages, that is largely absent  
363 in microglia in the same environment. These two cell types are likely exposed to the same signals  
364 within the brain, which suggests that the ontogeny of these cells has long lasting implications for  
365 their functional capacity. Transcription factors, including *Sall1*, that have been accepted as  
366 defining microglia identity may be shaping the transcriptional landscape, repressing certain loci  
367 that could potentially lead to damaging inflammation in the brain.<sup>44</sup> We suggest that these  
368 differences are evidence of a division of labor, with microglia and blood-derived macrophages

369 contributing in different ways to inflammation in the brain during infection with *T. gondii*. While  
370 blood-derived cells display a classic inflammation associated NF- $\kappa$ B response, microglia may be  
371 better suited to contributing to inflammation through the release of alarmins, rather than through  
372 upregulation of a broader NF- $\kappa$ B-dependent program that may be injurious to the local tissue.

373         We find the alarmin IL-1 $\alpha$  expressed in microglia, though they notably lack expression of  
374 IL-1 $\beta$  which is found in infiltrating myeloid cells. This suggests that both of these cell types may  
375 be able to participate in an IL-1 response, but in fundamentally different ways. Importantly, we  
376 show that host immunity is dependent on the activity of IL-1 $\alpha$  rather than IL-1 $\beta$ , and that IL-1 $\alpha$  is  
377 released *ex vivo* from microglia but not from infiltrating macrophages. In general, IL-1 $\beta$  has been  
378 the subject of more study than IL-1 $\alpha$ , and has a history of being implicated when IL-1 signaling is  
379 discussed. More recently, IL-1 $\alpha$  has been shown to contribute to certain inflammatory  
380 environments. IL-1 $\alpha$  release from lymph node macrophages in an inflammasome-independent  
381 death event has been shown to enhance antigen presentation and humoral responses to influenza  
382 vaccination.<sup>45</sup> IL-1 $\alpha$  has been shown to initiate lung inflammation in a model of sterile  
383 inflammation using silica.<sup>46</sup> Recently, some reports have suggested IL-1 $\alpha$  rather than IL-1 $\beta$  drives  
384 sepsis pathology.<sup>47</sup> IL-1 $\alpha$  activity in the CNS has begun to be studied, with a deleterious role for  
385 the cytokine shown in spinal cord injury.<sup>48</sup> IL-1 $\beta$  has been implicated in some infection models,  
386 but IL-1 $\alpha$  activity in brain infection has not previously been reported. As an alarmin expressed in  
387 the brain at baseline, IL-1 $\alpha$  is ideally placed to initiate inflammation in response to early damage  
388 caused by the parasite before there is robust immune infiltration.

389         In this work, we also show that IL-1 $\alpha$  likely signals on brain vasculature, promoting the  
390 infiltration of immune cells. We found that IL-1R1 expression on brain vasculature displays a

391 mosaic pattern. This could suggest that there are functionally distinct sub-populations of  
392 endothelial cells capable of becoming activated in response to different signals.<sup>49</sup> There is ample  
393 evidence in the literature to support IL-1R1 expression on endothelial cells as well as the  
394 responsiveness of CNS vasculature to IL-1.<sup>50-55</sup> However, IL-1 has also been shown to signal on  
395 immune cells.<sup>56-59</sup> We found that IL-1R1 expression on radio-resistant cells is what is important in  
396 our model, which is supportive of endothelial cells being the relevant responders, but there has  
397 also been evidence put forth that other brain resident cells can respond to IL-1. It has been  
398 suggested that microglial IL-1R1 expression plays a role in self-renewal after ablation.<sup>60</sup> Microglia  
399 are partially radio-resistant and do experience some turnover after irradiation and repopulation. It  
400 has also been suggested that IL-1 can act on neurons, though it should be noted that it has also  
401 been reported that neurons express a unique form of IL-1RAcP which affects downstream  
402 signaling.<sup>61</sup> It is unclear whether astrocytes express IL-1R1, but astrocytes represent another radio-  
403 resistant cell population in the brain that has the ability to affect immune cell infiltration through  
404 chemokine production.<sup>29,62</sup>

405         Infiltrating immune cells express pro-IL-1 $\beta$  but we have not detected a role for IL-1 $\beta$  in  
406 promoting inflammation in this model. We have also shown that they do not release IL-1 $\alpha$  *ex vivo*  
407 even though they express it, suggesting that they may die in an immunologically quiet way such  
408 as apoptosis, while microglia may undergo a more inflammatory form of cell death, including  
409 pyroptosis. If these two cell types do in fact undergo different forms of cell death, it is of great  
410 interest how microglia activate gasdermin-D to release inflammatory factors. It is possible that  
411 microglia in an area of parasite reactivation in the brain become infected, sense parasite products  
412 in the cytoplasm, and undergo death to eliminate this niche for parasite replication. NLRP1 and  
413 NLRP3 have both been shown to recognize *T. gondii*<sup>25-27</sup> and could be the potential sensors in

414 microglia. AIM2 is another inflammasome sensor that can recognize DNA<sup>63</sup> and could therefore  
415 be activated if parasite DNA becomes exposed to the cytosol. However, we and others<sup>7</sup> have not  
416 been able to observe direct infection of microglia in chronically infected mice. On the other hand,  
417 microglia migrate to sites of parasite reactivation and may recognize products resulting from host  
418 cell death or damage, such as ATP, and undergo death that will promote inflammation. The  
419 presence of ASC specks in infected brains suggests the formation of caspase-1-dependent  
420 canonical inflammasome, but it remains unclear if the ASC specks are directly linked to IL-1 $\alpha$   
421 release in microglia. Moreover, the canonical inflammasome can even be activated downstream of  
422 non-canonical inflammasome driven gasdermin-D pores.<sup>64</sup> Thus, the sensors upstream of caspase-  
423 dependent cleavage of gasdermin-D in microglia are of great interest.

424

## 425 **METHODS**

426

### 427 *Mice and infections*

428

429 C57BL/6 mice were purchased from The Jackson Laboratory or bred within our animal facility in  
430 specific pathogen-free facilities. All mice were age- and sex-matched for all experiments.  
431 Infections used the type II *T. gondii* strain Me49, which was maintained in chronically infected  
432 Swiss Webster mice (Charles River Laboratories) and passaged through CBA/J mice (The Jackson  
433 Laboratory) for experimental infections. For the experimental infections, the brains of chronically  
434 infected (4-8 week) CBA/J mice were homogenized to isolate tissue cysts. Experimental mice were  
435 then injected i.p. with 10 Me49 cysts. All procedures followed the regulations of the Institutional  
436 Animal Care and Use Committee at the University of Virginia.

437

438 *Sampling*

439

440 Within a single experiment, when multiple parameters were assessed in the same tissue, the same  
441 samples were used (i.e. for analysis of multiple immune cell populations by flow cytometry, cells  
442 from the same brain sample were used). Representative IHC images accompanying flow cytometry  
443 data were taken from distinct brain samples.

444

445 *T. gondii cyst counts*

446

447 Brain tissue was placed in complete RPMI, minced with a razor blade, and then passed through an  
448 18-gauge needle. 30  $\mu$ L of homogenate was placed on a microscope slide and covered with a  
449 coverslip. Cysts were counted manually on a brightfield DM 2000 LED microscope (Leica  
450 Biosystems).

451

452 *Tissue processing*

453

454 Immediately after sacrifice mice were perfused with 30 mL of cold 1X PBS. Brains and spleens  
455 were harvested and put into cold complete RPMI media (cRPMI) (10% FBS, 1%  
456 penicillin/streptomycin, 1% sodium pyruvate, 1% non-essential amino acids, and 0.1% 2-ME). If  
457 peritoneal lavage fluid was collected, prior to perfusion, 5 mL of cold 1X PBS was injected through  
458 the intact peritoneal membrane with a 26-gauge needle, and removed with a 22-gauge needle. If



459 serum was collected, blood from the heart was collected and allowed to clot at 4°C overnight to  
460 separate serum.

461 After harvest, brains were minced with a razor blade, passed through an 18-gauge needle,  
462 and then enzymatically digested with 0.227 mg/mL collagenase/dispase and 50 U/mL DNase  
463 (Roche) at 37°C for 45 minutes. After digestion, brains homogenate was passed through a 70 µm  
464 filter (Corning) and washed with cRPMI. To remove myelin from samples, filtered brain  
465 homogenate was then resuspended with 20 mL of 40% Percoll and spun at 650 x g for 25 minutes.  
466 Myelin was aspirated, samples were washed with cRPMI, and then resuspended in cRPMI. Spleens  
467 were mechanically homogenized and passed through a 40 µm filter (Corning). Samples were  
468 washed with cRPMI and then resuspended in 2 mL of RBC lysis buffer (0.16 M NH<sub>4</sub>Cl) for 2  
469 minutes. Cells were then washed with cRPMI and then resuspended. Peritoneal lavage fluid was  
470 washed with cRPMI, pelleted and resuspended.

471

472 *Cytospin*

473

474 Peritoneal lavage fluid samples were diluted to 1 x 10<sup>5</sup> cells/200 µL which was added to the upper  
475 chamber of the slide attachment (Simport). Samples were spun onto slides using a Cytospin 4  
476 (Thermo Scientific), and then H&E stained.

477

478 *Flow Cytometry and Cell Sorting*

479

480 Single cell suspensions from tissue samples were plated in a 96-well U-bottom plate. Cells were  
481 initially incubated with 50 µL Fc block (1 µg/mL 2.4G2 Ab (BioXCell), 0.1% rat γ globulin

482 (Jackson ImmunoResearch)) for 10 minutes at room temperature. Cells were then surface stained  
483 with antibodies and a Live/Dead stain for 30 minutes at 4°C. After surface staining, cells were  
484 washed with FACS buffer (0.2% BSA and 2 mM EDTA in 1X PBS) and fixed at 4°C for 30  
485 minutes with either 2% paraformaldehyde (PFA) or a fixation/permeabilization kit (eBioscience).  
486 Cells were then permeabilized and stained with any intracellular markers for 30 minutes at 4°C.  
487 Samples were then washed, resuspended in FACS buffer, and run on a Gallios flow cytometry  
488 (Beckman Coulter). Analysis was done using FlowJo software v.10. Antibody clones used include:  
489 CD31 (390), CD45 (30-F11), MHC-II (M5/114.15.2), NK1.1 (PK136), CD19 (1D3), CD3 (17A2),  
490 CD4 (GK1.5), CD11c (N418), CD11b (M1/70), Foxp3 (FJK-16s), Ly6G (1A8), Ly6C (HK1.4),  
491 CD8a (53-6.7), IFN- $\gamma$  (XMG1.2), NOS2 (CXNFT), IL-1 $\alpha$  (ALF-161), and pro-IL-1 $\beta$  (NJTEN3).

492 For cell sorting, CX3CR1cre<sup>ERT2</sup> x ZsGreen<sup>fl/stop/fl</sup> mice were used. After surface staining,  
493 live cells were analyzed on a BD Aria in the UVA flow cytometry core facility. Cells were sorted  
494 based on ZsGreen expression, into serum-containing media for *ex vivo* culture, or into Trizol for  
495 RNA-sequencing.

496

#### 497 *ex vivo Culture Experiments*

498

499 To assess IL-1 release, brain single-cell suspensions were plated in a 96-well plate in complete  
500 RPMI media with no additional stimulation. They were then incubated at 37°C for 4 hr to overnight  
501 (indicated in figure legends). For gasdermin-D inhibition assays, 20 $\mu$ M necrosulfonamide (NSA)  
502 was added to wells during incubation. Cells were pelleted and supernatants were collected for  
503 analysis. For sorted cell populations, equal numbers of microglia and macrophages were plated for  
504 analysis.

505

506 *Quantitative RT-PCR*

507

508 Approximately ¼ of a mouse brain was put into 1mL TRIzol (Ambion) in bead-beating tubes  
509 (Sarstedt) containing 1 mm zirconia/silica beads (BioSpec). Tissue was homogenized for 30  
510 seconds using a Mini-bead beater (BioSpec). RNA was extracted according to the manufacturer's  
511 instructions (Ambion). High Capacity Reverse Transcription Kit (Applied Biosystems) was used  
512 for cDNA synthesis. qRT-PCR was done using 2X Taq-based Master Mix (Bioline) and TaqMan  
513 gene expression assays (Applied Biosystems). Reactions were run on a CFX384 Real-Time  
514 System (Bio-Rad Laboratories). HPRT was used as the housekeeping gene for all reactions and  
515 relative expression was calculated as  $2^{(-\Delta\Delta CT)}$ .

516

517 *Immunohistochemistry*

518

519 Brains from mice were harvested and placed in 4% PFA for 24 hours. Following PFA fixation,  
520 brains were moved to a solution of 30% sucrose for 24 hours, and were then embedded in OCT  
521 and flash frozen on dry ice. Samples were stored at -20°C until cutting. After cutting, sections were  
522 blocked in 1X PBS containing 0.1% triton, 0.05% Tween 20, and 2% goat or donkey serum  
523 (Jackson ImmunoResearch) for 1 hour at room temperature. Sections were then incubated with  
524 primary Abs overnight at 4°C. Sections were then washed with PBS, and incubated with secondary  
525 Abs for 1 hour at room temperature. Sections were then washed, and nuclear stained with DAPI  
526 (Thermo Fisher Scientific) for 5 minutes at room temperature. Finally, sections were mounted,  
527 covered in Aquamount (Lerner Laboratories), and covered with coverslips (Thermo Fisher

528 Scientific). All images were captured using a Leica TCS SP8 Confocal microscopy system. Images  
529 were analyzed using either ImageJ or Imaris software.

530

### 531 *H&E Tissue Sections*

532

533 Brains from mice were submerged in formalin and sent to the UVA Research Histology Core,  
534 where they were embedded in paraffin and sectioned. They were then imaged on on a brightfield  
535 DM 2000 LED microscope (Leica Biosystems).

536

### 537 *ELISAs*

538

539 Samples for ELISAs were obtained by harvesting mouse brains and processing them to form a  
540 single cell suspension. Cells were then plated in 96-well plates and incubated at 37°C either  
541 overnight or for 5 hours (indicated in figure legends). Supernatants were then collected and stored  
542 at -20°C until use. ELISAs for IL-1 $\alpha$  and IL-1 $\beta$  (BioLegend), as well as for IFN- $\gamma$ , were performed  
543 according to the manufacturer's instructions. Briefly, Immunolon 4HBX ELISA plates (Thermo  
544 Fisher Scientific) were coated with capture antibody at 4° overnight. Plates were then washed and  
545 blocked with buffer containing BSA at room temperature for 1 hour. After washing, standards and  
546 samples were added and incubated at room temperature for 2 hours. After washing, biotinylated  
547 detection antibody was added and incubated for 1 hour at room temperature. Plates were washed  
548 and incubated with avidin-HRP for 30 minutes at room temperature. Finally, plates were washed  
549 and incubated with ABTS peroxide substrate solution (SouthernBiotech) for 15 minutes or until

550 color change occurred. Immediately after color change, plates were read on an Epoch Biotek plate  
551 reader using Gen5 2.00 software.

552

### 553 *Ab Blockade Experiments*

554

555 Chronically infected mice (4 weeks p.i.) were treated on days 1 and 3 of the treatment regimen  
556 with 200 µg i.p. each of anti-LFA-1 and anti-VLA-4 blocking antibodies (Bio X Cell) or control  
557 IgG. They were then sacrificed and analyzed on day 5.

558

### 559 *Propidium Iodide Injection*

560 Chronically infected mice (4 weeks p.i.) were injected i.p. with 0.4 mg of propidium iodide. 24  
561 hours after injection, mice were sacrificed and their brains were PFA fixed and analyzed by  
562 confocal microscopy.

563

### 564 *Microglia Depletion*

565 For studies involving microglia depletion, mice were fed either control chow or chow containing  
566 PLX5622 *ad libitum* for 12 days prior to harvest.

567

### 568 *Bone Marrow Chimeras*

569 At 8 weeks of age, C57B6/J and *Il1r1*<sup>-/-</sup> mice were irradiated with 1000 rad. Bone marrow cells  
570 isolated from WT and *Il1r1*<sup>-/-</sup> mice were then i.v. transferred (by retro-orbital injection) into the  
571 irradiated recipient mice. Mice were allowed to recover for 6 weeks after irradiation and

572 reconstitution and were then infected. 4 weeks post infection, mice were sacrificed and tissues  
573 were harvested for analysis.

574

### 575 *RNA Sequencing Data Analysis*

576

#### 577 Pre-Processing/Primary Analysis:

578 Read quality profiles for raw FASTQ files was performed with FastQC (v0.11.5) before and after  
579 trimming and filtering. Read filtering and trimming was accomplished with Trimmomatic (v0.39)  
580 paired-end set to phred33 quality scoring. Reads were trimmed according to a four-base sliding  
581 window with a minimum quality score of 15 and minimum leading and trailing quality scores of  
582 3. The minimum fragment length was set to 36. Trimmed and filtered reads were mapped to the  
583 GENCODE M13 genome and transcript abundances were quantified using Salmon (v0.8.2).  
584 Quantified transcript abundances were imported into the R programming environment and  
585 converted into ENSEMBL gene abundances with Tximport (v1.4.0). All pre-processing steps were  
586 performed within the Pypiper framework (v0.6.0) with Python version 2.7.14.

#### 587 Secondary and Tertiary Analysis:

588 Differential expression testing was performed using the R Bioconductor package DESeq2  
589 (v1.16.1) at a preset alpha value of 0.05. Log<sub>2</sub> fold change values were shrunken using a normal  
590 prior distribution. Any results that lacked the replicates or had low counts were thrown out of the  
591 dataset prior to differential expression testing. Results of differential expression testing were  
592 visualized using the R package EnhancedVolcano (v1.2.0) to display transformed p-values (-  
593 log<sub>10</sub>) against the corresponding log<sub>2</sub> fold change values. All labeled genes were manually  
594 selected from significantly differentially expressed genes in the DESeq2 results list.

595 Differential expression testing results were labeled as “upregulated” or downregulated” for  
596 a given pairwise comparison. All genes with a log<sub>2</sub> fold change value above 0 and a BH adjusted  
597 p-value below 0.05 were designated upregulated and all genes with a log<sub>2</sub> fold change value below  
598 0 and a BH adjusted p-value below 0.05 were designated downregulated. Gene names for the  
599 differential expression results tables were converted from mouse ENSEMBL codes to gene  
600 symbols with AnnotationDbi (v1.46.0). In order to determine the functional profile of the gene  
601 lists, the R package clusterProfiler (v3.12.0) was used to apply Fisher’s exact test with respect to  
602 over-representation of GO terms for biological processes at all levels of the Gene Ontology  
603 Consortium hierarchy. The lists were tested against a background distribution that consisted of all  
604 genes that returned a p-value in differential expression testing. Significant GO terms had a BH  
605 adjusted p-value below 0.05.

606 GO terms were manually selected from the results output in the clusterProfiler package for  
607 plotting with the pheatmap package (v1.0.12). Each GO term-specific heatmap displays rlog-  
608 transformed abundance values that have been Z-score normalized with respect to each gene. The  
609 genes displayed were selected from clusterProfiler results for enrichment of GO terms for  
610 biological processes. Significantly enriched GO terms were also selected and plotted using the  
611 clusterProfiler dotplot function.

612

613 *Statistics*

614

615 Statistical analysis comparing two groups at a single time point was performed in Prism software  
616 using an unpaired Student’s T test. When data from multiple experiments were combined, to show  
617 natural biological variability between infections, a randomized block ANOVA was performed

618 using R v.3.4.4 software. This test was designed to assess the effect of experimental group while  
619 controlling for any effect of experimental date, by modeling the group as a fixed effect and date as  
620 a random effect. Tests used for each figure is shown in the figure legend. All data were graphed  
621 using Prism software. Distributions were assumed to be normal. All graphs show the mean of the  
622 data, or the mean along with individual values. Error bars indicate standard deviation.

623

## 624 **ACKNOWLEDGEMENTS**

625 The authors would like to acknowledge members of the Harris lab and center for Brain  
626 Immunology and Glia (BIG) for their input during the development of this work. We thank  
627 Marieke K. Jones for her help with statistical analysis and coding. We thank Sarah Ewald and her  
628 lab at UVA for sharing the ASC-citrine mice used in this study. We would like to acknowledge  
629 the support we received from core facilities at the University of Virginia, including the Flow  
630 Cytometry Core and the Research Histology Core.

631

## 632 **AUTHOR CONTRIBUTIONS**

633 S.J.B. designed and performed experiments, analyzed data, and wrote the manuscript. K.M.S. and  
634 C.A.O. helped with experiments and discussed results and implications. J.A.T. performed the  
635 RNA-seq experiment. D.J. conducted bioinformatics analyses. J.R.L. provided reagents, mice, and  
636 conceptual advice. T.H.H. supervised the project and edited the manuscript.

637

## 638 **COMPETING INTERESTS STATEMENT**

639 The authors declare no competing interest.

640



641 **FIGURE LEGENDS**

642 **Figure 1. Microglia and macrophages in the infected brain differ in inflammatory signature**  
643 **and IL-1 expression**

644 **a-d**, Chronically infected  $CX_3CR_1^{Cre-ERT2} \times ZsGreen^{fl/stop/fl}$  mice were sacrificed and brains were  
645 harvested and processed for flow cytometry (n = 4 mice). Samples were run on a BD Aria, gated  
646 on live/singlets/CD45<sup>+</sup>/CD11b<sup>+</sup> from which ZsGreen<sup>+</sup> and ZsGreen<sup>-</sup> populations were gated and  
647 sorted. Sorted cell populations were subjected to RNA sequencing. **a**, Experimental setup. **b**,  
648 Differential abundance testing was performed and results were plotted in R to produce a volcano  
649 plot showing differentially expressed genes between microglia and macrophage populations.  
650 Example genes are labeled in red corresponding to green dots. **c**, GO terms statistically over-  
651 represented in macrophages compared to microglia were generated and a selection of significantly  
652 enriched pathways of interest were plotted using R. **d**, Significantly differentially expressed genes  
653 between the two cell populations were selected based on interest and plotted in a heatmap using  
654 complete-linkage clustering of a euclidean distance matrix of all samples. **e-l**, Representative  
655 images of brain sections from chronically infected  $CX_3CR_1^{Cre-ERT2} \times ZsGreen^{fl/stop/fl}$  mice. ZsGreen  
656 is shown in green (**e-f,j,l**) and sections were stained for Iba1 (green, **g-h**; gray, **i,k**), RelA (**e,g** red),  
657 Rel (**f,h** red), IL-1 $\beta$  (**i-j** red), and IL-1 $\alpha$  (**k-l** red). Scale bars indicate 30  $\mu$ m.

658

659 **Figure 2. IL-1R<sup>-/-</sup> mice have an impaired immune response to *T. gondii* infection.**

660 WT C57B6/J or *Il1r1*<sup>-/-</sup> mice were infected i.p. with 10 cysts of the Me49 strain of *T. gondii*. 6  
661 weeks p.i. brains were harvested and homogenized. (n = 3-5 mice per group per experiment) **a**,  
662 Cyst burden per brain was determined by counting cysts in brain homogenate on a light  
663 microscope. Paired averages from 5 experiments are shown, and statistics were performed using a

664 randomized block ANOVA. **b-g**, Brains from the same mice were processed to achieve a single  
665 cell suspension and analyzed by flow cytometry. Data compiled from 4 experiments; statistics  
666 were performed using a randomized block ANOVA. **b**, Blood derived myeloid cells were defined  
667 as CD11b<sup>+</sup>CD45<sup>hi</sup>, cells were pre-gated on singlets/live/CD45<sup>+</sup>/CD11c<sup>-</sup>, representative flow plots  
668 are shown in **(f-g)**. **c**, The number of iNOS<sup>+</sup> cells per brain were calculated, pre-gated on  
669 singlets/live/CD45<sup>+</sup>/CD11c<sup>-</sup>/CD11b<sup>+</sup>CD45<sup>hi</sup>, representative flow plots are shown in **(h-i)**. **d-e**,  
670 CD8<sup>+</sup> and CD4<sup>+</sup> T cell numbers were calculated, pre-gated on singlets/live/CD3<sup>+</sup>. **j-k**,  
671 Representative confocal images of focal areas of inflammation in chronically infected brains of  
672 WT **(j)** and IL-1r1<sup>-/-</sup> **(k)** mice. \* = p < 0.05, \*\* = p < 0.01, \*\*\* = p < 0.001. Scale bars indicate 50  
673 μm.

674

675 **Figure 3. IL-1R1 is expressed on brain vasculature during chronic *T. gondii* infection.**

676 **a-b**, Brains from chronically infected C57B6/J WT mice were sectioned and stained with DAPI  
677 (blue) and antibodies against laminin (red) and IL-1r1 (green), showing parenchymal blood  
678 vessels. **c-e**, WT (CD45.1) and *Il1r1*<sup>-/-</sup> (CD45.2) mice were lethally irradiated and then  
679 reconstituted with bone marrow from either WT or *Il1r1*<sup>-/-</sup> mice. Mice were allowed to reconstitute  
680 for 6 weeks and then were infected i.p. with 10 cysts of the Me49 strain of *T. gondii*. 4 weeks p.i.  
681 mice were sacrificed and their brains were harvested for analysis. (n = 3-6 mice per group per  
682 experiment) **d**, Brains were homogenized and cysts were counted by light microscopy. **e**, Brains  
683 were processed for flow cytometry and the numbers of total leukocytes were calculated. Cells were  
684 pre-gated on singlets/live. **d-e**, Data compiled from 2 experiments, statistics performed using a  
685 randomized block ANOVA. **f**, WT and *Il1r1*<sup>-/-</sup> mice were infected i.p. with 10 cysts of the Me49  
686 strain of *T. gondii*. 6 weeks p.i. the mice were sacrificed and brains were homogenized, RNA was

687 extracted, and qPCR analysis was performed. Data compiled from 2 (CCL2) or 3 (ICAM1,  
688 VCAM1) experiments; statistics performed using a randomized block ANOVA. (n = 3-5 mice per  
689 group per experiment) **g-j**, Brains from chronically infected WT and *Il1r1*<sup>-/-</sup> mice were sectioned  
690 and stained for either ICAM-1 (**g-h**) or VCAM-1 (**i-j**). Representative images of blood vessels are  
691 shown. **g-h**, scale bars are 50  $\mu$ m and (**i-j**) scale bars are 60  $\mu$ m. \* = p < 0.05, \*\* = p < 0.01, \*\*\*  
692 = p < 0.001.

693

694 **Figure 4. IL-1 $\alpha$ <sup>-/-</sup> but not IL-1 $\beta$ <sup>-/-</sup> mice have an impaired response to *T. gondii* infection.**

695 WT C57B6/J, IL-1 $\alpha$ <sup>-/-</sup>, and IL-1 $\beta$ <sup>-/-</sup> were infected i.p. with 10 cysts of the Me49 strain of *T. gondii*.  
696 6 weeks p.i. brains were harvested and analyzed. **a**, Genomic DNA was isolated from brain  
697 homogenate, and parasite DNA was quantified using real-time qPCR. Data compiled from 2  
698 experiments; statistics performed using a randomized block ANOVA. (n = 3-4 mice per group per  
699 experiment) **b-c**, Brain slices from WT (**b**) and IL-1 $\alpha$ <sup>-/-</sup> (**c**) were H&E stained and representative  
700 images are shown. Arrow heads indicate clusters of immune cells. **d-k**, Brains were processed to  
701 obtain a single cell suspension, and analyzed by flow cytometry. Paired averages from 4 or 5  
702 compiled experiments, statistics performed using a randomized block ANOVA. (n = 3-5 mice per  
703 group per experiment) **d,h**, Blood-derived myeloid cells per brain as defined by CD11b<sup>+</sup>CD45<sup>hi</sup>.  
704 Cells were pre-gated on singlets/live/CD45<sup>+</sup>/CD11c<sup>-</sup>. **e,i**, iNOS<sup>+</sup> cells per brain were quantified,  
705 pre-gated on singlets/live/CD45<sup>+</sup>/CD11c<sup>-</sup>/CD11b<sup>+</sup>CD45<sup>hi</sup>. **f-g, j-k**, CD8<sup>+</sup> and CD4<sup>+</sup> T cells were  
706 quantified, pre-gated on singlets/live/CD3<sup>+</sup>. \* = p < 0.05, \*\* = p < 0.01, \*\*\* = p < 0.001.

707

708 **Figure 5. IL-1 $\alpha$  is released *ex vivo* from microglia from *T. gondii* infected brains.**

709 **a**, Uninfected mice were fed either control chow or chow containing PLX5622 for 12 days prior  
710 to sacrifice. mRNA levels of IL-1 $\alpha$  were determined by RT-qPCR on whole brain homogenate. (n  
711 = 2 mice per group) **b**, 6 weeks p.i. brains from WT mice were harvested and processed to a single  
712 cell suspension. Cells were plated in a 96 well plate and incubated at 37°C overnight. IL-1 $\alpha$  release  
713 was then measured by ELISA. (n = 3 mice per group) **c-d**, Chronically infected CX<sub>3</sub>CR<sub>1</sub><sup>Cre-ERT2</sup> x  
714 ZsGreen<sup>fl/stop/fl</sup> mice were sacrificed and brains were harvested and processed for flow cytometry.  
715 Samples were run on a BD Aria, gated on live/singlets/CD45<sup>+</sup>/CD11b<sup>+</sup> from which ZsGreen<sup>+</sup> and  
716 ZsGreen<sup>-</sup> populations were gated and sorted. Cells from 6 mice were pooled. Equal numbers of  
717 each cell population were plated and incubated overnight at 37°C. (n = 3-4 wells per group)  
718 Supernatants were collected and analyzed by ELISA for IL-1 $\alpha$  (**c**) and LDH (**d**) (plotted as  
719 absorbance at 490nm-680nm). For (**c**) results from two experiments are shown. **e-f**, Assay was  
720 performed as in **b**, with some wells treated with glycine to stop membrane permeability (**e**) or  
721 triton-containing lysis buffer to show total possible release (**f**). Statistics were performed using  
722 Student's T test (**a-b**, **d-e**) or a Randomized Block ANOVA (**c**). \* = p < 0.05, \*\* = p < 0.01, \*\*\*  
723 = p < 0.001.

724

725 **Figure 6. Caspase-1/11<sup>-/-</sup> mice have an impaired response to *T. gondii* infection.**

726 **a-b**, Chronically infected C57B6/J mice were injected i.p. with 20 mg/kg propidium iodide. 24 hrs  
727 later, mice were sacrificed and brains were imaged with confocal microscopy. A representative  
728 image is shown. **c-d**, Mice expressing ASC-citrine (**c**) or ASC-citrine and CX<sub>3</sub>CR<sub>1</sub>-  
729 cre<sup>ERT2</sup>ZsGreen (**d**) were infected with 10 cysts of the Me49 strain of *T. gondii*. 4 weeks post  
730 infection brains were harvested, cryopreserved, stained, and imaged. Arrows indicate ASC  
731 aggregates in Iba1<sup>+</sup> cells (**c**) or in ZsGreen<sup>+</sup> microglial cells (**d**). **e-i**, WT and casp-1/11<sup>-/-</sup> mice were

732 infected with 10 cysts of the Me49 strain of *T. gondii*. 6 weeks p.i. brains were harvested and  
733 analyzed. Paired averages for 3-6 experiments are shown. (n = 3-5 mice per group per experiment)  
734 (e) Cyst burden per brain was determined by counting cysts in brain homogenate on a light  
735 microscope. f, Infiltrating myeloid cell populations were quantified by flow cytometry. Cells were  
736 pre-gated on singlets/live/CD45<sup>+</sup>/CD11c<sup>-</sup>. g, iNOS<sup>+</sup> cell populations were quantified, cells were  
737 pre-gated on singlets/live/CD45<sup>+</sup>/CD11c<sup>-</sup>/CD11b<sup>+</sup>/CD45<sup>hi</sup>. h-i, CD8<sup>+</sup> and CD4<sup>+</sup> T cell populations  
738 were quantified, cells were pre-gated on live/singlets/CD3<sup>+</sup>. j-k, Brain slices from WT (j) and  
739 caspase-1/11<sup>-/-</sup> (k) mice were H&E stained and representative images are shown. Arrow heads  
740 indicate parasite cysts. Statistics were performed using a randomized block ANOVA (e-i). \* = p  
741 < 0.05, \*\* = p < 0.01, \*\*\* = p < 0.001. Scale bars in (a-b) are 400 μm, scale bar in (d) is 15 μm,  
742 all other scale bars are 50 μm.

743

744 **Figure 7. Gasdermin D<sup>-/-</sup> mice have an impaired response to *T. gondii* infection and impaired**  
745 **IL-1α release.**

746 a-c, C57B6/J and Gasdermin D<sup>-/-</sup> mice were infected i.p. with 10 cysts of the Me49 strain of *T.*  
747 *gondii*. 6 weeks p.i., mice were sacrificed and tissues were harvested for analysis. Data from two  
748 experiments are shown (n = 4-5 mice per group) a, Cyst burden per brain was determined by  
749 counting cysts in brain homogenate on a light microscope. b, Brain tissue was processed for flow  
750 cytometry analysis and immune cell populations were quantified. All populations were previously  
751 gated on live/singlets. CD4<sup>+</sup> and CD8<sup>+</sup> were pre-gated on CD3<sup>+</sup> T cells; DCs were pre-gated on  
752 CD45<sup>+</sup> cells; infiltrating macrophage/monocytes (Mφ) are defined as CD11c<sup>-</sup>CD11b<sup>+</sup>CD45<sup>hi</sup>;  
753 iNOS<sup>+</sup> cells were gated within the Mφ gate. c, Single cell suspension from brain homogenate from  
754 WT and Gsdmd<sup>-/-</sup> mice was plated in a 96 well plate and incubated at 37°C overnight. Supernatant

755 was isolated and analyzed by ELISA for IL-1 $\alpha$ . **d**, Brain homogenate from WT mice was plated  
756 as in **c**, with either control media or 20  $\mu$ m necrosulfonamide (NSA). IL-1 $\alpha$  release from two  
757 experiments is shown (**d**). (n = 4 wells per group per experiment) Statistics were performed using  
758 a randomized block ANOVA. \* = p < 0.05, \*\* = p < 0.01, \*\*\* = p < 0.001.

759

760 **Supplementary Figure 1. Microglia and macrophages in the infected brain differ in IL-1**  
761 **expression.**

762 **a-d**, CX<sub>3</sub>CR<sub>1</sub><sup>Cre-ERT2</sup> x ZsGreen<sup>fl/stop/fl</sup> mice were left naïve or infected with 10 cysts of Me49 strain  
763 *T. gondii* parasites for 4 weeks. (n = 4 mice per group) **a**, Representative image of IL-1 $\alpha$  in naïve  
764 brain colocalizing with microglia, scale bar is 50  $\mu$ m. **b-d**, Brains were harvested and analyzed by  
765 flow cytometry with intracellular cytokine staining. Numbers of IL-1 $\alpha$ <sup>+</sup> (**b**), IL-1 $\beta$ <sup>+</sup> (**c**), and double  
766 positive (**d**) cells were quantified in both ZsGreen<sup>+</sup> and ZsGreen<sup>-</sup> populations in naïve and infected  
767 mice. Cells were pre-gated on singlets/live/ZsGreen. **e-g**, Brains from naïve or chronically infected  
768 mice were analyzed by flow cytometry. **e**, Representative plots of IL-1 $\alpha$  expression for naïve  
769 samples, previously gated on live/singlets. **f-g**, Representative plots of IL-1 $\alpha$  (**f**) and IL-1 $\beta$  (**g**)  
770 expression for infected samples.

771

772 **Supplementary Figure 2. Brain IFN- $\gamma$  responses and peripheral immune responses are not**  
773 **impaired in *Il1r1*<sup>-/-</sup> mice during chronic *T. gondii* infection.**

774 WT and *Il1r1*<sup>-/-</sup> mice were infected i.p. with 10 cysts of the Me49 strain of *T. gondii*. 6 weeks p.i.  
775 brains (**a-b**) and spleens (**c-h**) were harvested and processed for flow cytometry. Immune cell  
776 populations were enumerated. **a-b**, Brains were harvested and digested. Isolated cells were  
777 incubated at 37°C for 5 hours with a mix of PMA/ionomycin and brefeldin A. Intracellular

778 cytokine staining was performed and analyzed by flow cytometry. Cells were pre-gated on  
779 singlets/Live/CD3<sup>+</sup> and percent **(a)** and number **(b)** of IFN- $\gamma$ <sup>+</sup> CD4 and CD8<sup>+</sup> T cells were  
780 determined. **c**, Total immune cells, pre-gated on singlets/live. **d**, DCs, pre-gated on  
781 singlets/live/CD45<sup>+</sup>/Dump<sup>-</sup>(CD3/NK1.1/B220). **e**, Monocytes/ macrophages, pre-gated on  
782 singlets/live/ CD45<sup>+</sup>/CD11c<sup>-</sup>/CD11b<sup>+</sup>/CD45<sup>hi</sup>. **f**, CD8<sup>+</sup> T cells, pre-gated on singlets/live/CD3<sup>+</sup>. **g**,  
783 Effector CD4<sup>+</sup> T cells, pre-gated on singlets/live/CD3<sup>+</sup>. **h**, Tregs, pre-gated on singlets/live/CD3<sup>+</sup>.  
784 **a-b**, A representative experiment is shown and statistics were performed using a Student's T test.  
785 (n = 4-5 mice per group) **c-h**, Paired averages compiled from 3-6 experiments. Statistics were  
786 performed using a randomized block ANOVA. (n = 3-5 mice per group per experiment) \* = p <  
787 0.05, \*\* = p < 0.01, \*\*\* = p < 0.001.

788

789 **Supplementary Figure 3. IFN- $\gamma$  response and monocyte/macrophage response during acute**  
790 **infection are not impaired in *Il1r1*<sup>-/-</sup> mice.**

791 WT and *Il1r1*<sup>-/-</sup> mice were infected i.p. with 10 cysts of the Me49 strain of *T. gondii*. Mice were  
792 sacrificed 12 days p.i. **a**, Peritoneal lavage was performed and peritoneal exudate cells (PECs)  
793 were isolated and analyzed by flow cytometry. **b**, Spleen cells were isolated and analyzed by flow  
794 cytometry. **c**, Serum was harvested at the time of sacrifice and IFN- $\gamma$  in the serum was analyzed  
795 by ELISA. A representative experiment is shown (n = 4 mice per group). Statistics were performed  
796 using a Student's t-test between groups for each measure.

797

798 **Supplementary Figure 4. IL-1R1 is expressed by endothelial cells in the brain.**

799 **a**, Brains from chronically infected C57B6/J mice were harvested, fixed, and stained with  
800 antibodies against CD31 (red) and IL-1R1 (green). **b-c**, Brains from uninfected C57B6/J mice

801 were harvested and processed for flow cytometry analysis. Cells were previously gated on  
802 Singlets/Live/CD45<sup>-</sup> and then were gated on CD31<sup>+</sup> (**b**) and IL-1R1 (**c**) expression on the CD31<sup>+</sup>  
803 population.

804

805 **Supplementary Figure 5. The brain endothelium is activated during chronic *T. gondii***  
806 **infection.**

807 **a-d**, WT C57B6/J mice were either left naïve or infected i.p. with the Me49 strain of *T. gondii*. 4  
808 weeks p.i. mice were sacrificed and brains were harvested for flow cytometry analysis. (n = 2 mice  
809 per group) **a-b**, Samples were pre-gated on singlets/live/Hoescht<sup>+</sup>/CD45<sup>-</sup>/CD31<sup>+</sup> and then ICAM-  
810 1 expression was assessed. Representative plots from naïve (**a**) and infected (**b**) mice are shown.  
811 **c-d**, Samples were pre-gated as in **a** and then VCAM-1 expression was assessed. Representative  
812 plots from naïve (**c**) and infected (**d**) mice are shown. **e**, Histogram showing ICAM-1 expression  
813 on IL-1R1 positive and negative endothelial cells, the FMO is shown in filled gray **f**, Brains from  
814 chronically infected C57B6/J mice were harvested, fixed, and stained with antibodies against  
815 laminin (gray), IL-1r1 (red), and VCAM-1 (green). **g-i**, C57B6/J mice were infected i.p. with 10  
816 cysts of the Me49 strain of *T. gondii*. 4 weeks p.i. mice were treated with either control IgG or 200  
817 µg each of α-LFA-1 and α-VLA-4 blocking antibodies on days 1 and 3 of treatment, and were  
818 sacrificed on day 5. Brains were harvested and processed for flow cytometry. (n = 4-5 mice per  
819 group) **g**, Cells were previously gated on singlets/live/CD11c<sup>-</sup>/CD45<sup>+</sup> and the numbers of  
820 CD11b<sup>+</sup>CD45<sup>hi</sup> cells are shown. Of the CD45<sup>hi</sup> cells numbers of Ly6C<sup>hi</sup> cells (**h**) and iNOS<sup>+</sup> cells  
821 (**i**) were enumerated. Statistics were performed using a Student's T-test. \* = p < 0.05 \*\* = p <  
822 0.01, \*\*\* = p < 0.001.

823



824 **Supplementary Figure 6. Example gating strategy for brain immune populations.**

825 Myeloid and T cell populations were identified using two separate panels. **a-b**, for all panels,  
826 samples were first gated on singlets and then cells which excluded the live/dead dye. **c-e**, to identify  
827 T cell populations, live cells were plotted to gate on either CD8+CD3+ (**c**) or CD4+CD3+ (**d**) cells.  
828 **e**, to identify Tregs, CD4+ T cells were gated on Foxp3+. **f-j**, to identify myeloid cell populations  
829 live cells were first gated on CD45+ (**f**). CD45+ cells were then gated on CD11c and MHCII (**g**),  
830 CD11c+MHCII hi cells were called DCs. CD11c- cells were then gated by CD45 and CD11b (**i**).  
831 CD11b+CD45int cells were called microglia, and CD11b+CD45hi cells were called infiltrating  
832 myeloid cells. CD45hi cells were then gated on iNOS+ (**j**).

833

834 **REFERENCES**

- 835 1 Pappas, G., Roussos, N. & Falagas, M. E. Toxoplasmosis snapshots: global status of  
836 *Toxoplasma gondii* seroprevalence and implications for pregnancy and congenital  
837 toxoplasmosis. *Int J Parasitol* **39**, 1385-1394, doi:10.1016/j.ijpara.2009.04.003 (2009).  
838 2 Belanger, F., Derouin, F., Grangeot-Keros, L. & Meyer, L. Incidence and risk factors of  
839 toxoplasmosis in a cohort of human immunodeficiency virus-infected patients: 1988-1995.  
840 HEMOCO and SEROCO Study Groups. *Clin Infect Dis* **28**, 575-581, doi:10.1086/515147  
841 (1999).  
842 3 Flegr, J., Prandota, J., Sovickova, M. & Israili, Z. H. Toxoplasmosis--a global threat.  
843 Correlation of latent toxoplasmosis with specific disease burden in a set of 88 countries.  
844 *PLoS One* **9**, e90203, doi:10.1371/journal.pone.0090203 (2014).  
845 4 Jones, J. L. *et al.* *Toxoplasma gondii* infection in the United States: seroprevalence and risk  
846 factors. *Am J Epidemiol* **154**, 357-365 (2001).  
847 5 Luft, B. J. & Remington, J. S. Toxoplasmic encephalitis in AIDS. *Clin Infect Dis* **15**, 211-  
848 222 (1992).  
849 6 Renold, C. *et al.* *Toxoplasma* encephalitis in patients with the acquired immunodeficiency  
850 syndrome. *Medicine (Baltimore)* **71**, 224-239 (1992).  
851 7 Cabral, C. M. *et al.* Neurons are the Primary Target Cell for the Brain-Tropic Intracellular  
852 Parasite *Toxoplasma gondii*. *PLoS Pathog* **12**, e1005447,  
853 doi:10.1371/journal.ppat.1005447 (2016).  
854 8 Dubey, J. P. Bradyzoite-induced murine toxoplasmosis: stage conversion, pathogenesis,  
855 and tissue cyst formation in mice fed bradyzoites of different strains of *Toxoplasma gondii*.  
856 *J Eukaryot Microbiol* **44**, 592-602 (1997).  
857 9 Brown, C. R. & McLeod, R. Class I MHC genes and CD8+ T cells determine cyst number  
858 in *Toxoplasma gondii* infection. *J Immunol* **145**, 3438-3441 (1990).

- 859 10 Gazzinelli, R., Xu, Y., Hieny, S., Cheever, A. & Sher, A. Simultaneous depletion of CD4+  
860 and CD8+ T lymphocytes is required to reactivate chronic infection with *Toxoplasma*  
861 *gondii*. *J Immunol* **149**, 175-180 (1992).
- 862 11 Gazzinelli, R. T., Hakim, F. T., Hieny, S., Shearer, G. M. & Sher, A. Synergistic role of  
863 CD4+ and CD8+ T lymphocytes in IFN-gamma production and protective immunity  
864 induced by an attenuated *Toxoplasma gondii* vaccine. *J Immunol* **146**, 286-292 (1991).
- 865 12 Pfefferkorn, E. R. Interferon gamma blocks the growth of *Toxoplasma gondii* in human  
866 fibroblasts by inducing the host cells to degrade tryptophan. *Proc Natl Acad Sci U S A* **81**,  
867 908-912 (1984).
- 868 13 Nathan, C. F., Murray, H. W., Wiebe, M. E. & Rubin, B. Y. Identification of interferon-  
869 gamma as the lymphokine that activates human macrophage oxidative metabolism and  
870 antimicrobial activity. *J Exp Med* **158**, 670-689 (1983).
- 871 14 Selleck, E. M. *et al.* Guanylate-binding protein 1 (Gbp1) contributes to cell-autonomous  
872 immunity against *Toxoplasma gondii*. *PLoS Pathog* **9**, e1003320,  
873 doi:10.1371/journal.ppat.1003320 (2013).
- 874 15 Murray, H. W., Spitalny, G. L. & Nathan, C. F. Activation of mouse peritoneal  
875 macrophages in vitro and in vivo by interferon-gamma. *J Immunol* **134**, 1619-1622 (1985).
- 876 16 Ling, Y. M. *et al.* Vacuolar and plasma membrane stripping and autophagic elimination of  
877 *Toxoplasma gondii* in primed effector macrophages. *J Exp Med* **203**, 2063-2071,  
878 doi:10.1084/jem.20061318 (2006).
- 879 17 Degrandi, D. *et al.* Murine guanylate binding protein 2 (mGBP2) controls *Toxoplasma*  
880 *gondii* replication. *Proc Natl Acad Sci U S A* **110**, 294-299, doi:10.1073/pnas.1205635110  
881 (2013).
- 882 18 Biswas, A. *et al.* Ly6C(high) monocytes control cerebral toxoplasmosis. *J Immunol* **194**,  
883 3223-3235, doi:10.4049/jimmunol.1402037 (2015).
- 884 19 Kim, B. *et al.* The Interleukin-1alpha Precursor is Biologically Active and is Likely a Key  
885 Alarmin in the IL-1 Family of Cytokines. *Front Immunol* **4**, 391,  
886 doi:10.3389/fimmu.2013.00391 (2013).
- 887 20 Di Paolo, N. C. & Shayakhmetov, D. M. Interleukin 1alpha and the inflammatory process.  
888 *Nat Immunol* **17**, 906-913, doi:10.1038/ni.3503 (2016).
- 889 21 Black, R. A. *et al.* Generation of biologically active interleukin-1 beta by proteolytic  
890 cleavage of the inactive precursor. *J Biol Chem* **263**, 9437-9442 (1988).
- 891 22 Broz, P. & Dixit, V. M. Inflammasomes: mechanism of assembly, regulation and  
892 signalling. *Nat Rev Immunol* **16**, 407-420, doi:10.1038/nri.2016.58 (2016).
- 893 23 He, W. T. *et al.* Gasdermin D is an executor of pyroptosis and required for interleukin-  
894 1beta secretion. *Cell Res* **25**, 1285-1298, doi:10.1038/cr.2015.139 (2015).
- 895 24 Dower, S. K. *et al.* The cell surface receptors for interleukin-1 alpha and interleukin-1 beta  
896 are identical. *Nature* **324**, 266-268, doi:10.1038/324266a0 (1986).
- 897 25 Cirelli, K. M. *et al.* Inflammasome sensor NLRP1 controls rat macrophage susceptibility  
898 to *Toxoplasma gondii*. *PLoS Pathog* **10**, e1003927, doi:10.1371/journal.ppat.1003927  
899 (2014).
- 900 26 Ewald, S. E., Chavarria-Smith, J. & Boothroyd, J. C. NLRP1 is an inflammasome sensor  
901 for *Toxoplasma gondii*. *Infect Immun* **82**, 460-468, doi:10.1128/IAI.01170-13 (2014).
- 902 27 Gorfu, G. *et al.* Dual role for inflammasome sensors NLRP1 and NLRP3 in murine  
903 resistance to *Toxoplasma gondii*. *MBio* **5**, doi:10.1128/mBio.01117-13 (2014).

- 904 28 Coutermarsh-Ott, S. L. *et al.* Caspase-11 Modulates Inflammation and Attenuates  
905 *Toxoplasma gondii* Pathogenesis. *Mediators Inflamm* **2016**, 9848263,  
906 doi:10.1155/2016/9848263 (2016).
- 907 29 Still, K. M. B., S.J.; Thompson, J.A.; Hayes, N.W.; O'Brien, C.; Harris, T.H. The damage  
908 signal IL-33 promotes a focal protective myeloid cell response to *Toxoplasma gondii* in the  
909 brain. *bioRxiv*, doi:<https://doi.org/10.1101/338400> (2018).
- 910 30 Yona, S. *et al.* Fate mapping reveals origins and dynamics of monocytes and tissue  
911 macrophages under homeostasis. *Immunity* **38**, 79-91, doi:10.1016/j.immuni.2012.12.001  
912 (2013).
- 913 31 Sedgwick, J. D. *et al.* Isolation and direct characterization of resident microglial cells from  
914 the normal and inflamed central nervous system. *Proc Natl Acad Sci U S A* **88**, 7438-7442  
915 (1991).
- 916 32 Martin-Sanchez, F. *et al.* Inflammasome-dependent IL-1beta release depends upon  
917 membrane permeabilisation. *Cell Death Differ* **23**, 1219-1231, doi:10.1038/cdd.2015.176  
918 (2016).
- 919 33 Rubartelli, A., Cozzolino, F., Talio, M. & Sitia, R. A novel secretory pathway for  
920 interleukin-1 beta, a protein lacking a signal sequence. *EMBO J* **9**, 1503-1510 (1990).
- 921 34 Gross, O. *et al.* Inflammasome activators induce interleukin-1alpha secretion via distinct  
922 pathways with differential requirement for the protease function of caspase-1. *Immunity*  
923 **36**, 388-400, doi:10.1016/j.immuni.2012.01.018 (2012).
- 924 35 Chen, X. *et al.* Pyroptosis is driven by non-selective gasdermin-D pore and its morphology  
925 is different from MLKL channel-mediated necroptosis. *Cell Res* **26**, 1007-1020,  
926 doi:10.1038/cr.2016.100 (2016).
- 927 36 Liu, X. *et al.* Inflammasome-activated gasdermin D causes pyroptosis by forming  
928 membrane pores. *Nature* **535**, 153-158, doi:10.1038/nature18629 (2016).
- 929 37 Kanneganti, A. *et al.* GSDMD is critical for autoinflammatory pathology in a mouse model  
930 of Familial Mediterranean Fever. *J Exp Med* **215**, 1519-1529, doi:10.1084/jem.20172060  
931 (2018).
- 932 38 Rathkey, J. K. *et al.* Chemical disruption of the pyroptotic pore-forming protein gasdermin  
933 D inhibits inflammatory cell death and sepsis. *Sci Immunol* **3**,  
934 doi:10.1126/sciimmunol.aat2738 (2018).
- 935 39 Blanchard, N., Dunay, I. R. & Schluter, D. Persistence of *Toxoplasma gondii* in the central  
936 nervous system: a fine-tuned balance between the parasite, the brain and the immune  
937 system. *Parasite Immunol* **37**, 150-158, doi:10.1111/pim.12173 (2015).
- 938 40 Chao, C. C. *et al.* Effects of cytokines on multiplication of *Toxoplasma gondii* in microglial  
939 cells. *J Immunol* **150**, 3404-3410 (1993).
- 940 41 Chao, C. C. *et al.* Activated microglia inhibit multiplication of *Toxoplasma gondii* via a  
941 nitric oxide mechanism. *Clin Immunol Immunopathol* **67**, 178-183,  
942 doi:10.1006/clin.1993.1062 (1993).
- 943 42 Chao, C. C., Gekker, G., Hu, S. & Peterson, P. K. Human microglial cell defense against  
944 *Toxoplasma gondii*. The role of cytokines. *J Immunol* **152**, 1246-1252 (1994).
- 945 43 Bohlen, C. J. *et al.* Diverse Requirements for Microglial Survival, Specification, and  
946 Function Revealed by Defined-Medium Cultures. *Neuron* **94**, 759-773 e758,  
947 doi:10.1016/j.neuron.2017.04.043 (2017).
- 948 44 Buttgereit, A. *et al.* Sall1 is a transcriptional regulator defining microglia identity and  
949 function. *Nat Immunol* **17**, 1397-1406, doi:10.1038/ni.3585 (2016).

- 950 45 Chatziandreou, N. *et al.* Macrophage Death following Influenza Vaccination Initiates the  
951 Inflammatory Response that Promotes Dendritic Cell Function in the Draining Lymph  
952 Node. *Cell Rep* **18**, 2427-2440, doi:10.1016/j.celrep.2017.02.026 (2017).
- 953 46 Rabolli, V. *et al.* The alarmin IL-1alpha is a master cytokine in acute lung inflammation  
954 induced by silica micro- and nanoparticles. *Part Fibre Toxicol* **11**, 69, doi:10.1186/s12989-  
955 014-0069-x (2014).
- 956 47 Benjamin, J. T. *et al.* Cutting Edge: IL-1alpha and Not IL-1beta Drives IL-1R1-Dependent  
957 Neonatal Murine Sepsis Lethality. *J Immunol* **201**, 2873-2878,  
958 doi:10.4049/jimmunol.1801089 (2018).
- 959 48 Bastien, D. *et al.* IL-1alpha Gene Deletion Protects Oligodendrocytes after Spinal Cord  
960 Injury through Upregulation of the Survival Factor Tox3. *J Neurosci* **35**, 10715-10730,  
961 doi:10.1523/JNEUROSCI.0498-15.2015 (2015).
- 962 49 Vanlandewijck, M. *et al.* A molecular atlas of cell types and zonation in the brain  
963 vasculature. *Nature* **554**, 475-480, doi:10.1038/nature25739 (2018).
- 964 50 Liu, X. *et al.* Cell-Type-Specific Interleukin 1 Receptor 1 Signaling in the Brain Regulates  
965 Distinct Neuroimmune Activities. *Immunity* **50**, 317-333 e316,  
966 doi:10.1016/j.immuni.2018.12.012 (2019).
- 967 51 Levesque, S. A. *et al.* Myeloid cell transmigration across the CNS vasculature triggers IL-  
968 1beta-driven neuroinflammation during autoimmune encephalomyelitis in mice. *J Exp*  
969 *Med* **213**, 929-949, doi:10.1084/jem.20151437 (2016).
- 970 52 Salmeron, K., Aihara, T., Redondo-Castro, E., Pinteaux, E. & Bix, G. IL-1alpha induces  
971 angiogenesis in brain endothelial cells in vitro: implications for brain angiogenesis after  
972 acute injury. *J Neurochem* **136**, 573-580, doi:10.1111/jnc.13422 (2016).
- 973 53 Sironi, M. *et al.* IL-1 stimulates IL-6 production in endothelial cells. *J Immunol* **142**, 549-  
974 553 (1989).
- 975 54 Thornton, P. *et al.* Platelet interleukin-1alpha drives cerebrovascular inflammation. *Blood*  
976 **115**, 3632-3639, doi:10.1182/blood-2009-11-252643 (2010).
- 977 55 Chang, C. H., Huang, Y. & Anderson, R. Activation of vascular endothelial cells by IL-  
978 1alpha released by epithelial cells infected with respiratory syncytial virus. *Cell Immunol*  
979 **221**, 37-41 (2003).
- 980 56 Di Paolo, N. C. *et al.* Virus binding to a plasma membrane receptor triggers interleukin-1  
981 alpha-mediated proinflammatory macrophage response in vivo. *Immunity* **31**, 110-121,  
982 doi:10.1016/j.immuni.2009.04.015 (2009).
- 983 57 Lichtman, A. H., Chin, J., Schmidt, J. A. & Abbas, A. K. Role of interleukin 1 in the  
984 activation of T lymphocytes. *Proc Natl Acad Sci U S A* **85**, 9699-9703,  
985 doi:10.1073/pnas.85.24.9699 (1988).
- 986 58 Ben-Sasson, S. Z. *et al.* IL-1 enhances expansion, effector function, tissue localization, and  
987 memory response of antigen-specific CD8 T cells. *J Exp Med* **210**, 491-502,  
988 doi:10.1084/jem.20122006 (2013).
- 989 59 Jain, A., Song, R., Wakeland, E. K. & Pasare, C. T cell-intrinsic IL-1R signaling licenses  
990 effector cytokine production by memory CD4 T cells. *Nat Commun* **9**, 3185,  
991 doi:10.1038/s41467-018-05489-7 (2018).
- 992 60 Bruttger, J. *et al.* Genetic Cell Ablation Reveals Clusters of Local Self-Renewing Microglia  
993 in the Mammalian Central Nervous System. *Immunity* **43**, 92-106,  
994 doi:10.1016/j.immuni.2015.06.012 (2015).

995 61 Smith, D. E. *et al.* A central nervous system-restricted isoform of the interleukin-1 receptor  
996 accessory protein modulates neuronal responses to interleukin-1. *Immunity* **30**, 817-831,  
997 doi:10.1016/j.immuni.2009.03.020 (2009).

998 62 Strack, A., Asensio, V. C., Campbell, I. L., Schluter, D. & Deckert, M. Chemokines are  
999 differentially expressed by astrocytes, microglia and inflammatory leukocytes in  
1000 *Toxoplasma* encephalitis and critically regulated by interferon-gamma. *Acta Neuropathol*  
1001 **103**, 458-468, doi:10.1007/s00401-001-0491-7 (2002).

1002 63 Lugrin, J. & Martinon, F. The AIM2 inflammasome: Sensor of pathogens and cellular  
1003 perturbations. *Immunol Rev* **281**, 99-114, doi:10.1111/imr.12618 (2018).

1004 64 Ruhl, S. & Broz, P. Caspase-11 activates a canonical NLRP3 inflammasome by promoting  
1005 K(+) efflux. *Eur J Immunol* **45**, 2927-2936, doi:10.1002/eji.201545772 (2015).

1006

1007

1008

1009

1010

1011

1012

1013

1014

1015

1016

1017

1018

1019

1020

1021

1022

1023



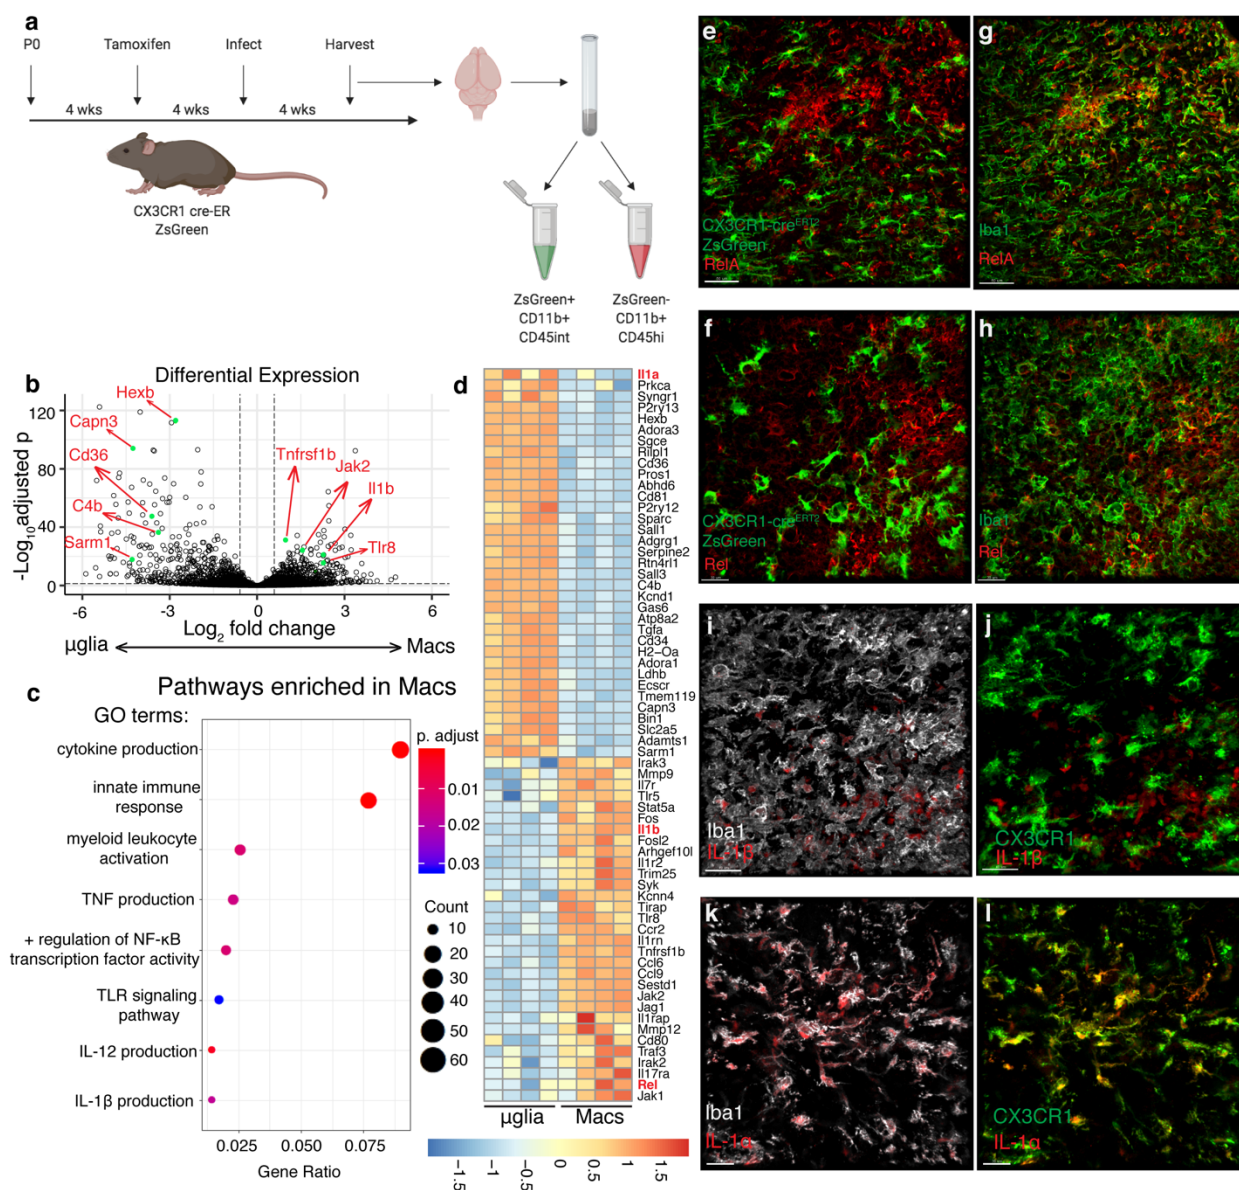

1024

1025 **Figure 1.**

1026

1027

1028

1029

1030

1031

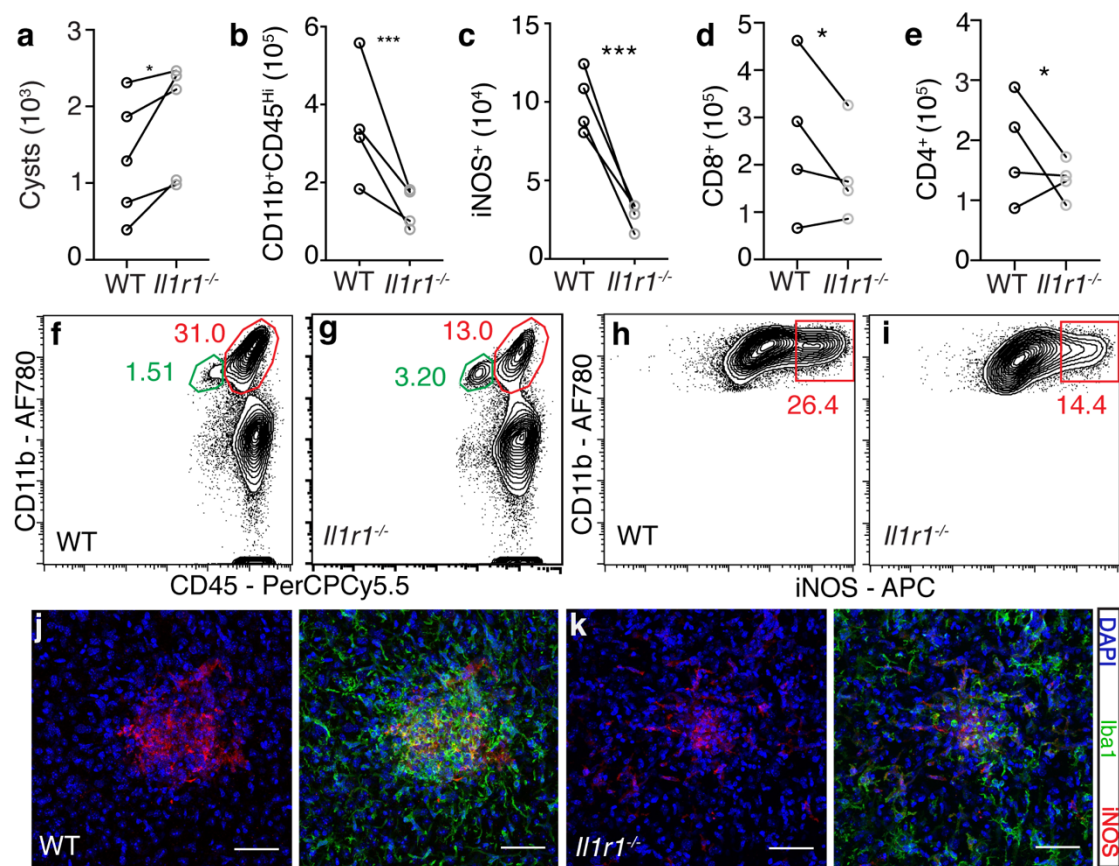

1032

1033 **Figure 2.**

1034

1035

1036

1037

1038

1039

1040

1041

1042

1043

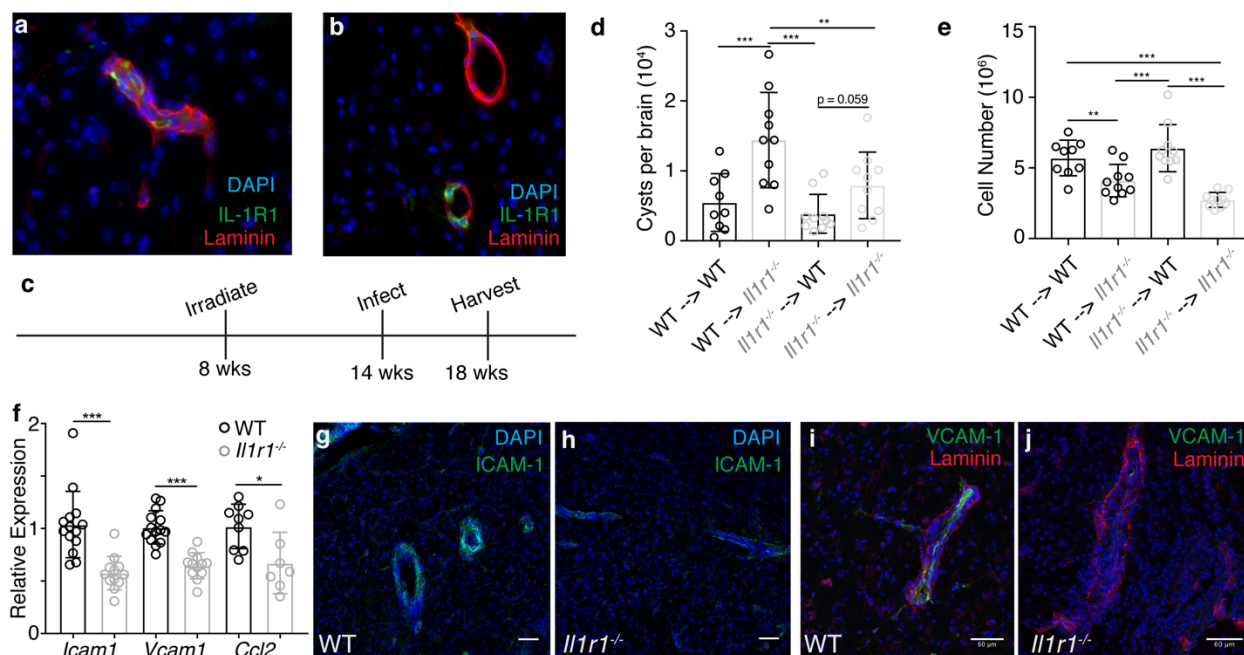

1044

1045 **Figure 3.**

1046

1047

1048

1049

1050

1051

1052

1053

1054

1055

1056

1057

1058



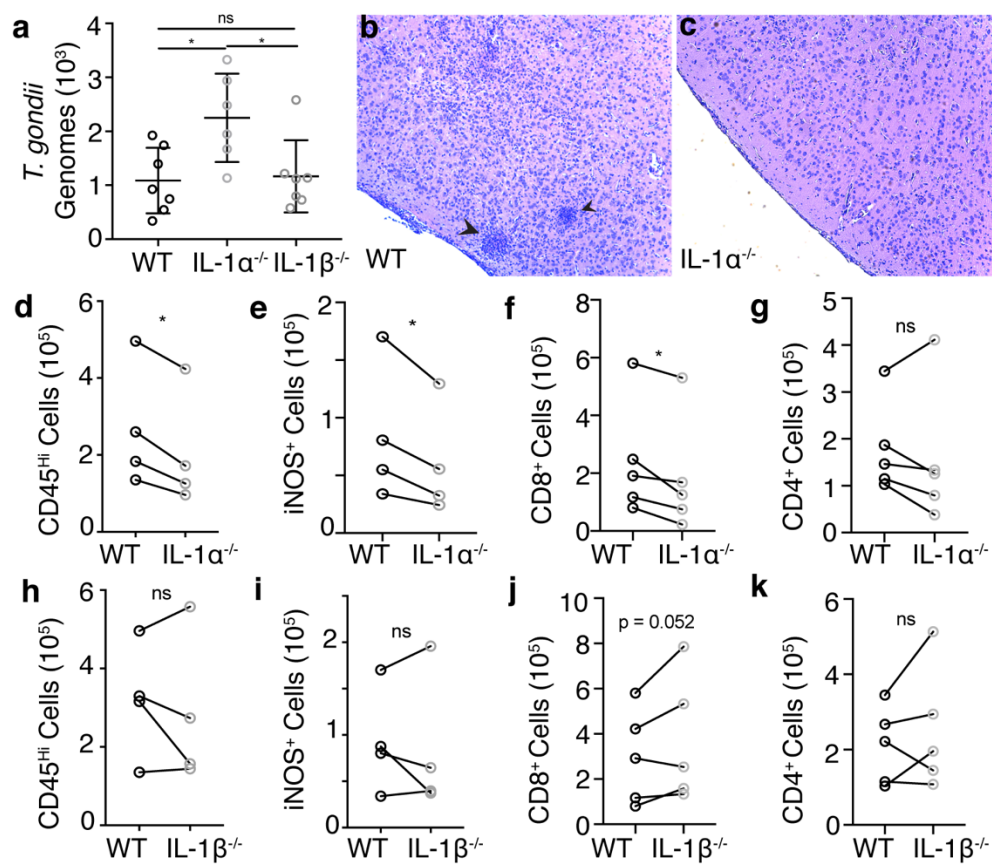

1059

1060 **Figure 4.**

1061

1062

1063

1064

1065

1066

1067

1068

1069

1070

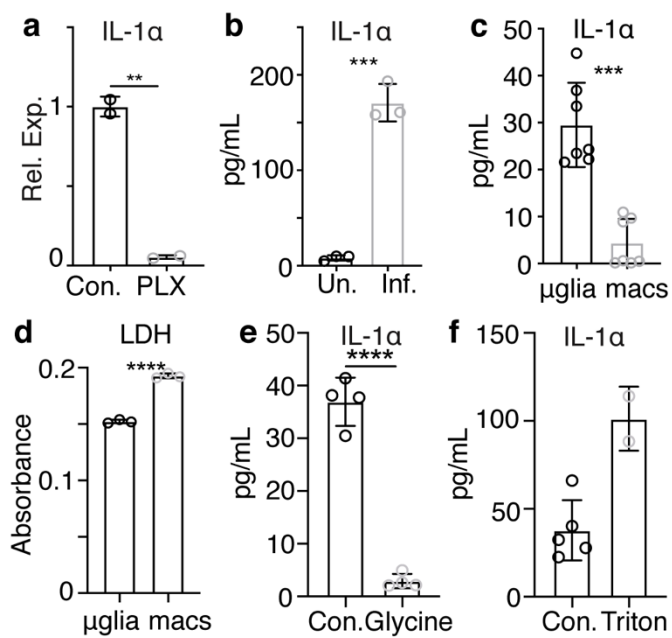

1071

1072 **Figure 5.**

1073

1074

1075

1076

1077

1078

1079

1080

1081

1082

1083

1084

1085

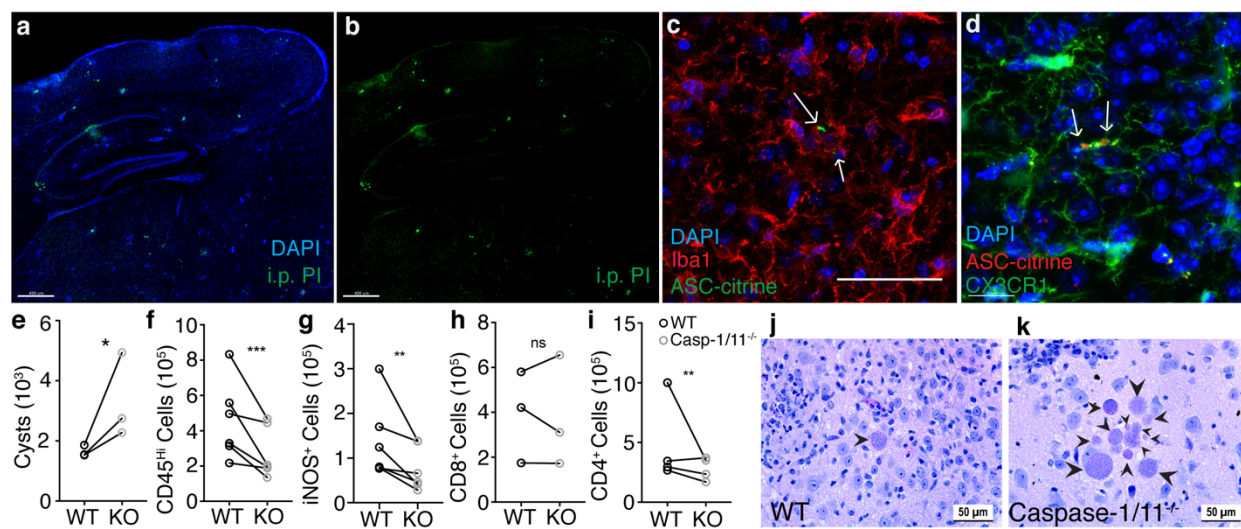

1086

1087 **Figure 6.**

1088

1089

1090

1091

1092

1093

1094

1095

1096

1097

1098

1099

1100

1101

1102

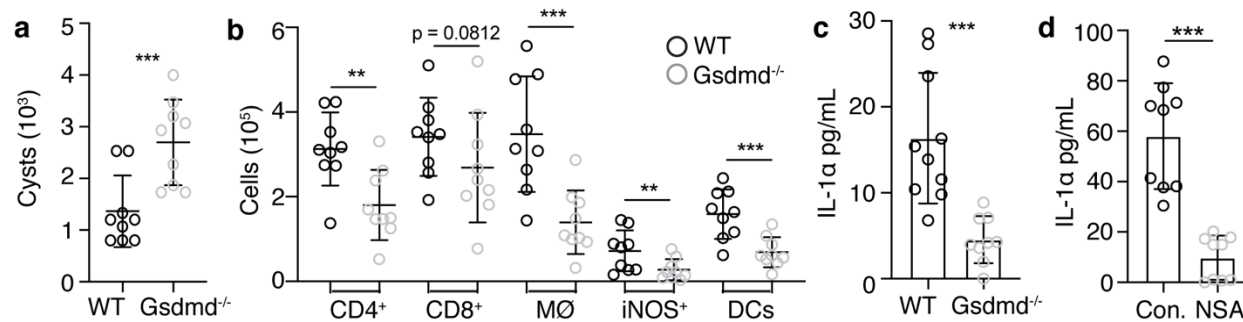

1103

1104 **Figure 7.**

1105

1106

1107

1108

1109

1110

1111

1112

1113

1114

1115

1116

1117

1118

1119

1120

1121

1122

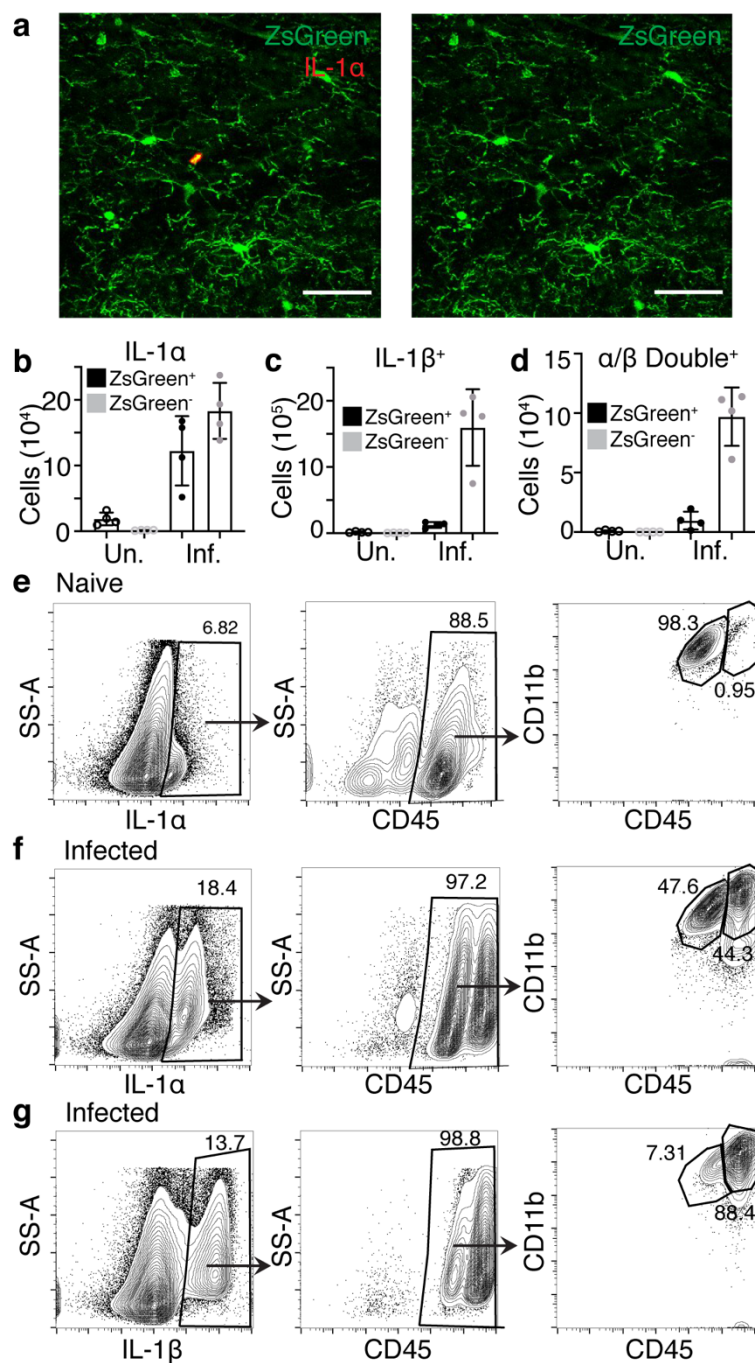

Figure S1.

1123  
1124  
1125  
1126  
1127  
1128  
1129  
1130

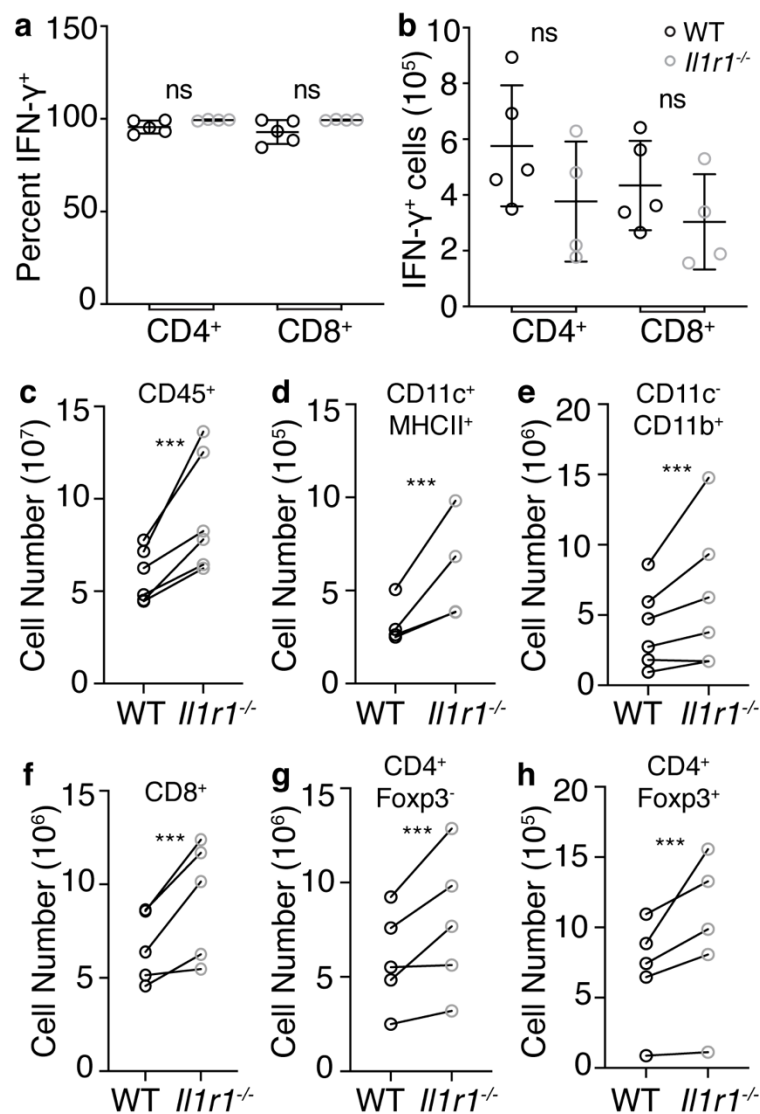

1131  
1132  
1133  
1134  
1135  
1136  
1137  
1138  
1139  
1140  
1141  
1142  
1143  
1144  
1145  
1146

Figure S2.

1147

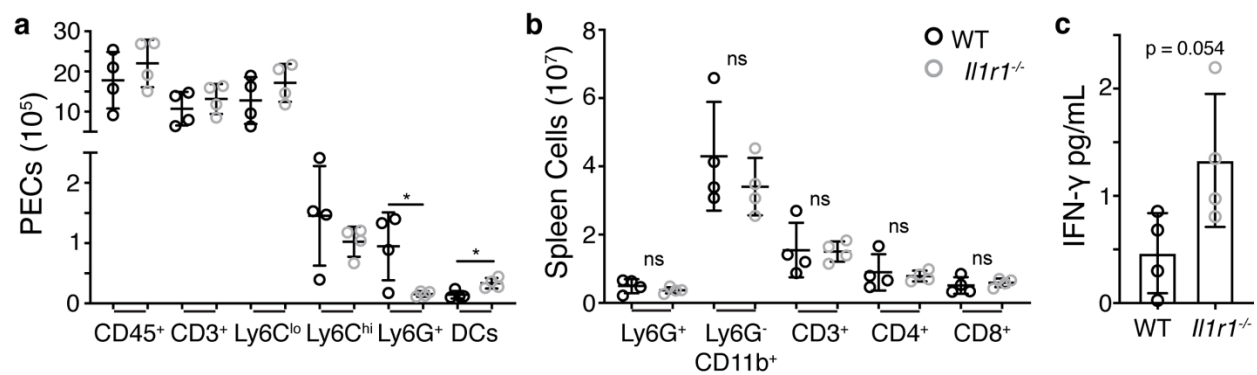

1148  
1149 **Figure S3.**

1150  
1151  
1152  
1153  
1154  
1155  
1156  
1157  
1158  
1159  
1160  
1161  
1162  
1163  
1164  
1165  
1166  
1167  
1168  
1169  
1170  
1171  
1172  
1173  
1174  
1175  
1176

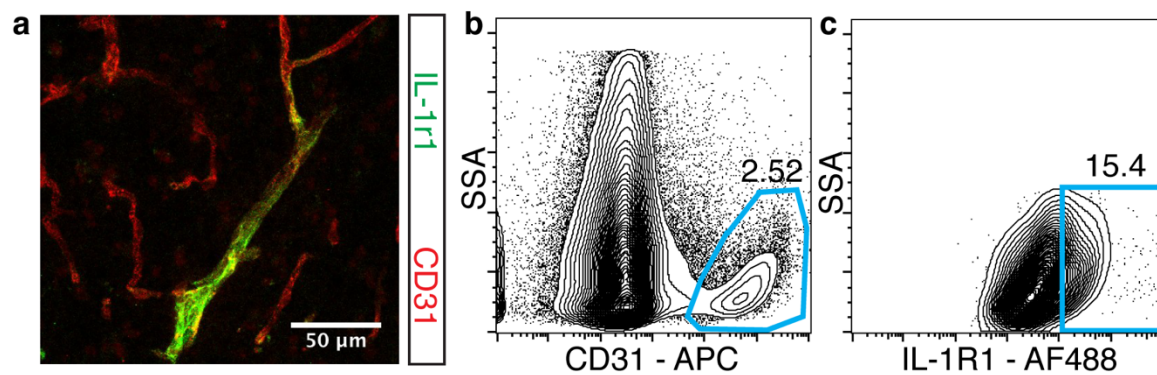

Figure S4.

1177  
1178  
1179  
1180  
1181  
1182  
1183  
1184  
1185  
1186  
1187  
1188  
1189  
1190  
1191  
1192  
1193  
1194  
1195  
1196  
1197  
1198  
1199  
1200  
1201  
1202  
1203  
1204  
1205  
1206  
1207



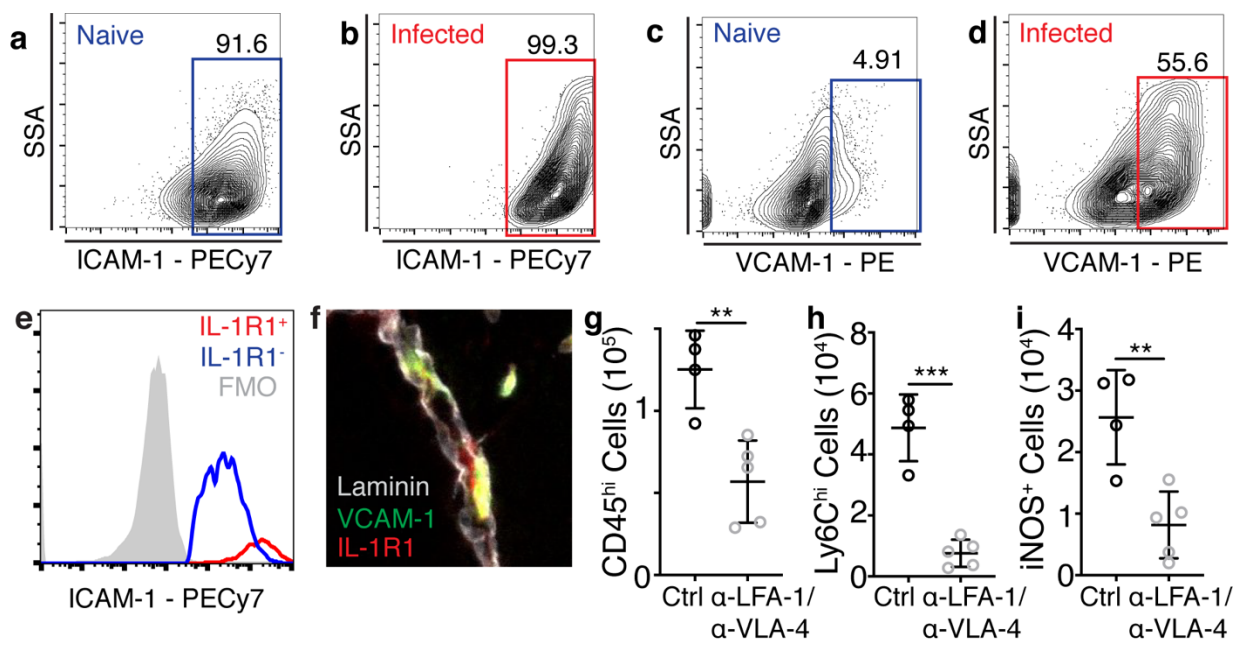

1208 **Figure S5.**

1209

1210

1211

1212

1213

1214

1215

1216

1217

1218

1219

1220

1221

1222

1223

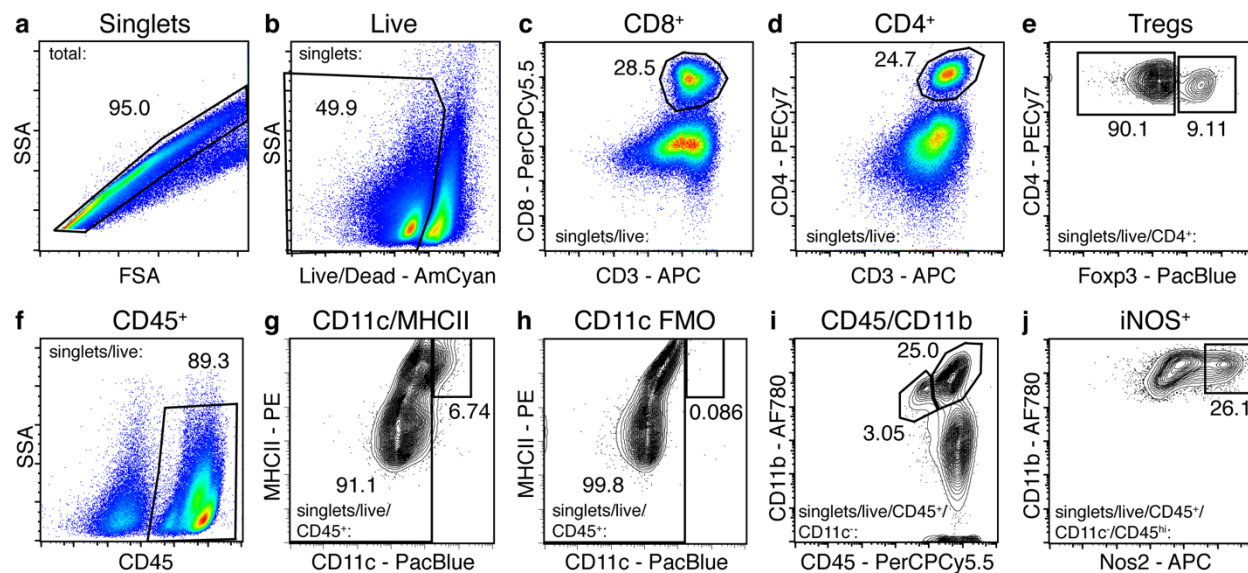

1224  
1225

1226 **Figure S6.**

1227  
1228
